# Supplementary material for: Developing and validating a risk prediction model for preterm birth at Felege Hiwot Comprehensive Specialized Hospital, North-West Ethiopia: a retrospective follow-up study
Source: PubMed Central journal article supplement — BMJ Open. 2022 Sep 26;12(9):e061061. doi: 10.1136/bmjopen-2022-061061 (PMC9516143; doi:10.1136/bmjopen-2022-061061), 2022-09-26
Supplement: bmjopen-2022-061061.draft_revisions.pdf [file bmjopen-2022-061061.draft_revisions.pdf]

# BMJ Open

BMJ Open is committed to open peer review. As part of this commitment we make the peer review history of every article we publish publicly available.

When an article is published we post the peer reviewers' comments and the authors' responses online. We also post the versions of the paper that were used during peer review. These are the versions that the peer review comments apply to.

The versions of the paper that follow are the versions that were submitted during the peer review process. They are not the versions of record or the final published versions. They should not be cited or distributed as the published version of this manuscript.

BMJ Open is an open access journal and the full, final, typeset and author-corrected version of record of the manuscript is available on our site with no access controls, subscription charges or pay-per-view fees (<http://bmjopen.bmj.com>).

If you have any questions on BMJ Open's open peer review process please email [info.bmjopen@bmj.com](mailto:info.bmjopen@bmj.com)

# BMJ Open

## Developing and validating a risk score for prediction of preterm birth at Felege Hiwot Comprehensive Specialized Hospital, Northwest, Ethiopia: Retrospective follow up study, 2021

|                               |                                                                                                                                                                                                                                                                                                                                                                                                                                                       |
|-------------------------------|-------------------------------------------------------------------------------------------------------------------------------------------------------------------------------------------------------------------------------------------------------------------------------------------------------------------------------------------------------------------------------------------------------------------------------------------------------|
| Journal:                      | <i>BMJ Open</i>                                                                                                                                                                                                                                                                                                                                                                                                                                       |
| Manuscript ID                 | bmjopen-2022-061061                                                                                                                                                                                                                                                                                                                                                                                                                                   |
| Article Type:                 | Original research                                                                                                                                                                                                                                                                                                                                                                                                                                     |
| Date Submitted by the Author: | 01-Feb-2022                                                                                                                                                                                                                                                                                                                                                                                                                                           |
| Complete List of Authors:     | <p>Feleke, Sefineh; Woldia University, Public health<br/>         Anteneh, Zelalem; Bahir Dar University College of Medical and Health Sciences, Epidemiology<br/>         Wassie, Gizachew; Bahir Dar University College of Medical and Health Sciences, Epidemiology and Biostatistics<br/>         Yalew, Anteneh ; Wolkite University, Department of Public Health<br/>         Dessie , Anteneh; Debre Tabor University, Reproductive Health</p> |
| Keywords:                     | OBSTETRICS, PUBLIC HEALTH, PERINATOLOGY                                                                                                                                                                                                                                                                                                                                                                                                               |
|                               |                                                                                                                                                                                                                                                                                                                                                                                                                                                       |

SCHOLARONE™  
Manuscripts

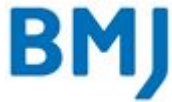

I, the Submitting Author has the right to grant and does grant on behalf of all authors of the Work (as defined in the below author licence), an exclusive licence and/or a non-exclusive licence for contributions from authors who are: i) UK Crown employees; ii) where BMJ has agreed a CC-BY licence shall apply, and/or iii) in accordance with the terms applicable for US Federal Government officers or employees acting as part of their official duties; on a worldwide, perpetual, irrevocable, royalty-free basis to BMJ Publishing Group Ltd ("BMJ") its licensees and where the relevant Journal is co-owned by BMJ to the co-owners of the Journal, to publish the Work in this journal and any other BMJ products and to exploit all rights, as set out in our [licence](#).

The Submitting Author accepts and understands that any supply made under these terms is made by BMJ to the Submitting Author unless you are acting as an employee on behalf of your employer or a postgraduate student of an affiliated institution which is paying any applicable article publishing charge ("APC") for Open Access articles. Where the Submitting Author wishes to make the Work available on an Open Access basis (and intends to pay the relevant APC), the terms of reuse of such Open Access shall be governed by a Creative Commons licence – details of these licences and which [Creative Commons](#) licence will apply to this Work are set out in our licence referred to above.

Other than as permitted in any relevant BMJ Author's Self Archiving Policies, I confirm this Work has not been accepted for publication elsewhere, is not being considered for publication elsewhere and does not duplicate material already published. I confirm all authors consent to publication of this Work and authorise the granting of this licence.

1  
2  
3 Developing and validating a risk score for prediction of preterm birth at Felege Hiwot  
4 Comprehensive Specialized Hospital, Northwest Ethiopia: Retrospective follow- up study  
5  
6 *Sefineh F.Feleke*<sup>1</sup>, *Zelalem A.Anteneh*<sup>2</sup>, *Gizachew T.Wassie*<sup>2</sup>, *Anteneh K.Yalew*<sup>3</sup>, *Anteneh*  
7 *M.Dessie*<sup>4</sup>  
8  
9

- 10 1. *Woldia University, Collage of Health Science, Department of Public Health*
- 11 2. *Bahir Dar University, College of Medicine and Health Science, School of Public Health,*  
12 *Department of Epidemiology and Biostatistics.*
- 13 3. *Wolkite University, Collage of Health Science, Department of Public Health*
- 14 4. *Debre Tabor University, Collage of Medicine and Health science, Department of*  
15 *Public Health*  
16  
17  
18  
19  
20  
21  
22

23 *Correspondence: Sefineh Fenta*

24 *Collage of Health Science, Department of Public Health, Woldia University, Woldia, Ethiopia*

25 *Email address: [fentasefineh21@gmail.com](mailto:fentasefineh21@gmail.com)*

26  
27  
28 *Phone number: +251928573882*  
29  
30  
31  
32  
33  
34  
35  
36  
37  
38  
39  
40  
41  
42  
43  
44  
45  
46  
47  
48  
49  
50  
51  
52  
53  
54  
55  
56  
57

**Objective:** To develop and validate a risk score for the prediction of preterm birth using maternal characteristics.

**Method:** A retrospective follow-up study was conducted on March (1- 30) 2021 at Felege Hiwot comprehensive specialized hospital. The sample size was determined by assuming 10 events per predictor, based on this assumption total sample size was 1308. Data were collected using a structured checklist through chart review. Data were coded and entered into Epidata, version 3.02, and was analyzed by using R statistical programming language version 4.0.4 for further processing and analysis. Bivariable logistic regression was done to identify the relationship between each predictor and preterm birth. Variables with ( $p \leq 0.25$ ) from the bivariable analysis were entered into a backward stepwise multivariable logistic regression model, and significant variables ( $p < 0.05$ ) were retained in the multivariable model. Model accuracy and goodness of fit were assessed by computing the area under the ROC curve (discrimination) and calibration plot (calibration) respectively

**Results:** Residence, gravidity, hemoglobin  $< 11$  mg/dl, early rupture of membranes, antepartum hemorrhage, and pregnancy-induced hypertension remained in the final multivariable prediction model. The AUC of the model was 0.816 (95% confidence interval: 0.779 – 0.856).

**Conclusion:** These results suggest the possibility of predicting preterm birth using a simple prediction model constructed from maternal characteristics.

#### **Strength and Limitations of the study**

- ✓ Adequate number of participants with the outcome, which helped us to construct the model using a sufficient number of predictor variables.
- ✓ Prediction model is constructed from easily obtainable maternal characteristics that make it applicable in primary care settings.
- ✓ A single-site study, it is confined to a single area, which needs external validation before using it in another context.
- ✓ Furthermore, data were collected from each mother's card; due to this, some important variables were missed, such as previously highlighted factors with preterm birth in different studies

## Background

Preterm birth is described as babies that are born alive before the end of 37 weeks of pregnancy[1]. Preterm birth can be accidental (due to spontaneous preterm labor and/or preterm membrane rupture) or induced by the provider (by cesarean or labor induction)[2]. Most preterm births happen spontaneously[3].

An estimated 15 million babies worldwide are born too early per year. That's more than 1 in 10 infants. About 1 million newborns die per year because of preterm birth complications[4].

Across 184 countries, the rate of preterm birth ranges from 5% to 18% of babies born [5]. However, there are stark disparities in survival rates around the world. Half of the babies born at or below 32 weeks die in low-income settings due to a lack of practical, cost-effective, and critical care, such as comfort, breastfeeding assistance, basic infection care, and trouble Breathing[6].

In Ethiopia, every year, 320,000 babies are born too early and because of direct preterm complications, 24,400 children under five die [7]. According to the 2019 Mini Ethiopia Demographic and Health Survey, the neonatal mortality rate was 30 deaths per 1,000 live births and prematurity was the major cause of death[8]

Furthermore, the effect of preterm birth is also prolonged beyond the neonatal phase and throughout life[9]. Hence, the largest risk of severe health issues, including cerebral palsy, intellectual disability, chronic lung disease, and vision and hearing loss, is faced by babies born before maturity. This introduces a lifelong disability dimension. At some point in their lives, most people will face the struggles and potential disasters of preterm birth either directly in their families or indirectly through events for the nations[9, 10].

To alleviate this burden in the past few decades, numerous methods have been attempted internationally, including in Ethiopia, to prevent and enhance the treatment of preterm births [11-13]. Although several efforts were undertaken to prevent and reduce preterm birth, its rate appears to have increased over time [10, 14]. As part of the strategy, it is essential to diagnose or predict preterm birth earlier in pregnancy to take appropriate measures for high-risk groups.

There are clinical prediction models that attempt to predict the probability of preterm birth, however, all include laboratory tests that are generally not accessible in low-resource settings, like fetal fibronectin, insulin-like growth factor binding protein-1 (IGFBP-1), interleukin-6, and placental alpha-macroglobulin-1 to predict preterm birth[15-20].

Hence, because of limited resources, the use of easily accessible data to forecast preterm birth seems to be appealing in low- and middle-income areas. Although there are prediction models for preterm birth, variation in the occurrence of preterm birth globally is relevant, indicating variations in exposure to psychosocial, sociodemographic, and medical risk factors and genetic differences [21-23].

There is no prediction model for preterm birth in Ethiopia. Therefore, developing and validating a risk score for prediction of preterm birth using maternal (clinical and non-clinical) characteristics based on the available measurement is paramount to allow early preterm birth intervention such as utero transfer to tertiary care centers, appropriate corticosteroid administration while preventing excessive use, neuroprotective magnesium sulfate therapy, and antibiotic treatment in the event of infection [15, 24]

## **Methods and Materials**

### **Study setting**

This retrospective study was conducted among 1260 pregnant women who did prenatal care and finally delivered at Felege Hiwot Comprehensive Specialized Hospital, Bahir Dar city, Northwest Ethiopia from January 30, 2019, to January 30, 2021. Bahir Dar is the capital city of Amhara national regional state and is found 575 km northwest of Addis Ababa.

Felege Hiwot comprehensive specialized hospital was established with the German State government during the regime of Emperor H/ Selassie I in April 1963 G.C and is one of the oldest public hospitals in the Northwestern part of the country and located at the northern end of the city near Lake Tana and aspires to see a healthy, productive and prosperous society and become a center of medical service Excellency by 2029. During its establishment, it was planned to serve 25,000 people. The hospital has currently a total of 1431 manpower (5 obstetricians and gynecologists and 63 midwives among others) in different disciplines. It has a total of 500 formal beds, 11 wards (emergency ward and Inpatient wards such as Gynecological & Obstetric, Surgical, orthopedics, Medical, Pediatric, L&D, Eye unit, NICU, psychiatric, oncology, and 22 OPDS), 39 clinical and non-clinical departments /service units / providing laboratory, Diagnostic, curative & Rehabilitation service at outpatient & inpatient bases as well as disease prevention & health promotion services.

### **Sample size determination**

The sample size required for model development was determined based on the minimum standard of 10 events per candidate predictor considered, according to the formula  $N = (n \times 10)/I$  where  $N$  is the sample size,  $n$  is the number of candidate predictor variables and  $I$  is the estimated event rate in the population[25]. Since there were 17 candidate predictors considered and 10 events per candidate predictor, the estimated number of events for the study was 170. Based on a study done on the prevalence of preterm birth in Debre Tabor hospital was 13%[26], so taking into account this the required sample size was calculated as follows,  $n = 170 \times 100 / 13 = 1308$ .

### **Patient and public involvement**

There was no direct interaction with patients in this study and no direct patient involvement in the design or conduct of this study.

### **Study Design and Participants**

The theoretical design of the present study was; the incidence of preterm birth as a function of multiple predictors during pregnancy. The source population of the study was all pregnant mothers who gave birth at FHCSH. To be included in this study, mothers must meet all of the following eligibility criteria; All medical records of mothers who gave birth and had at least one ANC follow-up in FHCSH from January 30/2019 to January 30/2021.

### **Sampling method and procedures**

A simple random sampling technique was employed to select participants using the medical registration number of a delivered mother from the delivery registration book. First, all mother delivered at FHCSH from January 30/2019 to January 30/2021 was identified from the delivery registration book. After that records of mothers who meet the inclusion criteria were included in the study. Subsequently, a sampling frame was prepared. Finally, the study unit was selected by using a computer-generated random number.

### **Data Collection**

**Outcome assessment:** The outcome variable was attributed to women whose medical records indicated a physician or midwife diagnosis of preterm birth and delivery between 28 and 36 completed weeks of gestation. The gestational age (GA) was measured using either LNMP, which is found to be a more reliable measure of GA in a low-resource setting[27, 28], or an early ultrasound result.



Predictor assessment: Data was collected using a structured checklist through chart review. Checklists were developed after reviewing various relevant literature [29-33]. It consists of socio-demographic (Maternal age, Residence), Maternal obstetric characteristics : (History of preterm birth, History of abortion, history of stillbirth gravidity, Parity, Multiple pregnancy, APH, PROM, Gestational DM, and PIH), Maternal medical condition : (HGB level, Diabetic Mellitus, Chronic Hypertension, UTI and HIV).

### Quality Assurance Mechanisms

To maintain the quality of data, the data collectors and supervisors were trained for a day on the objective of the study, the content of the checklists, how to fill the checklists. Afterward, reviewing 15 charts on medical records of mothers who gave birth at Felege Hiwot Comprehensive Specialized Hospital which is found in Northwest Ethiopia were done. After that, some adjustments were done accordingly. The checklist was developed in English.

### Data Processing and Analysis

Data were entered into a software application (EPI DATA, version 3.02) and was analyzed by using R statistical programming language version 4.0.4 for further processing and analysis. There were 13(1%), 2(0.2 %), 11 (0.9 %),15 (2.5%), 21 (1.7%) ,29(2.3%),20(1.6%) and 20 (1.6%) missing values for premature rupture of membranes , residence, chronic hypertension, multiple pregnancy gestational diabetes Mellitus, pregnancy-induced hypertension ,antepartum hemorrhage and hemoglobin respectively. We assumed data were missing at random, and we, therefore, performed a multivariate imputation by chained equations for all variables evaluated in the prediction model [34]. Sensitivity analysis was performed to assess whether the assumption of missing at random (MAR) is valid or not, and the results were reasonably comparable (**Table1**). Descriptive statistics including median, inter-quartile range (IQR), and percentages, were carried out.

**Table 1. Sensitivity analysis of the model to predict preterm birth: Comparison of the regression coefficients, standard errors (SE), and p-values for complete case analysis (CCA) and multiple imputed data (MI).**

| Predictor variables  | Complete case analysis |        |         | Multiple imputations |        |         |
|----------------------|------------------------|--------|---------|----------------------|--------|---------|
|                      | B                      | SE     | P value | B                    | SE     | P value |
| Chronic hypertension | 0.7313                 | 0.6297 | 0.24    | 0.581                | 0.6285 | 0.92    |

|                          |       |        |        |       |        |        |
|--------------------------|-------|--------|--------|-------|--------|--------|
| (yes)                    |       |        |        |       |        |        |
| Residence (rural)        | 0.815 | 0.1946 | <0.001 | 1.154 | 0.1958 | <0.001 |
| GDM(yes )                | 0.709 | 0.4028 | 0.07   | 0.472 | 0.4236 | 0.26   |
| HGB(<11g/dl)             | 0.497 | 0.2185 | 0.02   | 0.642 | 0.2153 | 0.001  |
| PROM (yes)               | 1.898 | 0.2080 | <0.001 | 2.097 | 0.2129 | <0.001 |
| APH (yes)                | 1.194 | 0.2858 | <0.001 | 1.298 | 0.2874 | <0.001 |
| PIH (yes)                | 1.353 | 0.2600 | <0.001 | 1.368 | 0.2523 | <0.001 |
| Multiple pregnancy (yes) | 0.539 | 0.3173 | 0.08   | 0.446 | 0.3257 | 0.17   |
| Gravidity(primigravida)  | 0.426 | 0.1944 | 0.02   | 0.711 | 0.1976 | <0.001 |

### Model Development and Validation

For model development, bivariable logistic regression was done to obtain insight into the association of each potential predictor and preterm birth. Variables with ( $p < 0.25$ ) from the bivariable analysis were entered into a backward stepwise multivariable logistic regression model, and significant variables ( $p < 0.05$ ) were retained in the multivariable model. The results of significant predictors were reported as coefficients with 95% confidence intervals (CI). To check for the model accuracy and goodness of fit, we computed the area under the ROC curve (discrimination) and calibration plot (calibration) using “classifierplots” and “givitiR” packages of R respectively. The AUC ranged from 0.5 (no predictive ability) to 1 (perfect discrimination)[35]. The regression coefficients and their 95% confidence levels, and the AUC were adjusted for overfitting or over-optimism using bootstrapping technique. To make internal validation, we computed 1000 random bootstrap [36]samples with the replacement on all predictors in the data. The model’s predictive performance after bootstrapping is considered as the performance that can be expected when the model is applied to future similar populations. To evaluate the clinical and public health impact of the model, we performed a decision curve analysis (DCA) [37] of standardized net benefit across a range of threshold probabilities (0 to 1). In the DCA, the model was compared against two extreme scenarios; “intervention for all” and “no intervention”. In our case, the intervention considered is the referral of high-risk pregnant women to facilities where appropriate corticosteroid administration, antibiotic treatment.

### Risk Score Development

1  
2  
3 To construct an easily applicable preterm birth prediction score, we transformed each coefficient  
4 from the model to a rounded number by dividing it by the lowest coefficient. The number of  
5 points was subsequently rounded to the nearest integer. We determined the total score for each  
6 individual by assigning the points for each variable present and adding them up. The score was  
7 transformed to a dichotomous, allowing each pregnant woman to be classified as having a high  
8 or low risk of preterm birth. The receiver operating characteristic curve (ROC) was plotted and  
9 the area under the curve (AUC) was calculated to measure the discriminatory power of the  
10 scoring system.  
11

### 12 **Ethical Approval**

13 Ethical clearance was obtained from the Institutional Review Boards (IRB) of Bahir Dar  
14 University, College of Medicine and Health Sciences with Protocol number 083/ 2021) on  
15 February 26, 2021. Confidentiality was maintained by omitting the personal identifier of the  
16 participant during the data collection procedure and information was used only for research  
17 purposes. Data were collected from the register, which was kept in a secure place and all data  
18 were fully anonymized before we access them. After the collection of data, all the patient records  
19 and patients' cards were placed back into a secure place. Data were entered into a password-  
20 protected computer.  
21  
22  
23  
24  
25  
26  
27  
28  
29  
30  
31  
32  
33  
34  
35  
36  
37  
38  
39  
40  
41  
42  
43  
44  
45  
46  
47  
48  
49  
50  
51  
52  
53  
54  
55  
56  
57

## Result

### Demographic, Obstetric, and Clinical Characteristics of mothers who gave birth at Felege Hiwot Comprehensive Specialized Hospital.

A total of 1260 study cards were reviewed from a sample of 1308, about 48 cards were not reviewed due to the outcome of intrauterine fetal death, abortion. *Table (2)* shows the demographic, obstetric, and clinical characteristics of mothers who gave birth included in the analysis. The median age of the study participants was 26 years with IQR (24-30years); the majority of the participants 1086 (86.2%) were in the age group of 20-34 years.

More than three fourth of the participants 926 (73.49%) were urban residents. From the total of mothers who delivered at FHCSH, more than two-third 841 (66.7%) were multigravida. About parity, above half of them 713 (56.6%) were multipara. Concerning past obstetric history, 55 (6.5%) of them had a history of previous preterm birth, 76 (9%) of them had a previous history of stillbirth and 162 (19.3%) of them had a previous history of abortion.

**Table 2. Demographic, obstetric, and clinical characteristics of mothers who gave birth at FHCSH from January 30/2019 to January 30/2021, in Northwest Ethiopia.**

| Characteristics      | Category     | Frequency | Percent |
|----------------------|--------------|-----------|---------|
| Gravidity            | Primigravida | 419       | 33.3    |
|                      | Multigravida | 841       | 66.7    |
| Residence            | Urban        | 926       | 73.5    |
|                      | Rural        | 334       | 26.5    |
| GDM                  | Yes          | 44        | 3.5     |
|                      | No           | 1216      | 96.5    |
| APH                  | Yes          | 84        | 6.7     |
|                      | No           | 1176      | 93.3    |
| PIH                  | Yes          | 110       | 8.73    |
|                      | No           | 1150      | 91.27   |
| HGB level            | <11d/dl      | 236       | 18.7    |
|                      | >=11g/dl     | 1024      | 81.3    |
| Chronic hypertension | Yes          | 21        | 1.7     |
|                      | No           | 1239      | 98.3    |

|                      |     |      |      |
|----------------------|-----|------|------|
| PROM                 | Yes | 195  | 15.5 |
|                      | No  | 1065 | 84.5 |
| Multiple pregnancies | Yes | 90   | 7.2  |
|                      | No  | 1170 | 92.8 |

*PROM: Premature rupture of membrane, HGB: hemoglobin, PIH: pregnancy-induced hypertension, APH: antepartum hemorrhage, GDM: gestational diabetes mellitus*

### Development of prediction model for preterm birth

Out of 1260 delivered neonates, 169 (13.4%) (95% CI (11.6%, 15.4%)) was preterm infants.

The bivariable logistic regression analysis found several factors were eligible to be included in the prediction model. Variables with  $P \leq 0.25$  in the bivariable logistic regression analysis were hemoglobin level, Gravidity, residence, gestational diabetes mellitus, APH, PIH, chronic hypertension, PROM, and multiple pregnancies. Using the results, a prediction model was developed and an equation for the prediction model was obtained. (*Table 3*)

**Table 3: Coefficients and risk-scores of each predictor included in the model to predict preterm birth ( $n = 1260$ )**

| Predictors<br>Variables*    | Multivariable analysis        |                   |             |               |
|-----------------------------|-------------------------------|-------------------|-------------|---------------|
|                             | Original $\beta$<br>(95 % CI) | Bootstrap $\beta$ | P-<br>value | Risk<br>score |
| Residence<br>(rural)        | 1.161 ( 0.780, 1.545 )        | 1.148             | <0.001      | 2             |
| Gravidity<br>(primigravida) | 0.675 ( 0.291, 1.061 )        | 0.666             | 0.01        | 1             |
| PROM (yes)                  | 2.081 ( 1.669 , 2.50 )        | 2.051             | <0.001      | 3             |
| APH (yes)                   | 1.364 ( 0.806 , 1.915 )       | 1.348             | <0.001      | 2             |
| PIH (yes)                   | 1.387 ( 0.887 , 1.879 )       | 1.368             | <0.001      | 2             |
| HGB <11g/dl                 | 0.676 ( 0.255 , 1.09 )        | 0.677             | <0.001      | 1             |

\*Variables retained in the reduced model are; residence, APH, hemoglobin, PIH, gravidity, and PROM. Both backward and forward selection showed the same results.  $\beta$  after internal validation with bootstrapping is shown. Simplified risk score: we divided the coefficient of predictors

1  
2  
3 included in the reduced model by the smallest (0.666). The probability or risk of preterm birth =  $1 / (1$   
4  $+ \exp - (-3.517 + 1.148 * \text{Residence (rural)} + 0.666 * \text{gravity (primigravida)} + 2.051 * \text{PROM}$   
5  $(\text{yes}) + 1.348 * \text{APH (yes)} + 1.387 * \text{PIH} + 0.677 * \text{HGB (<11g/dl)}..$   
6  
7

8 The AUC of the final reduced model was 0.816 (95% confidence interval: 0.779 – 0.856)  
9 **(Figure 1a)**. The calibration test had a p-value of 0.6228, indicating that the model does not  
10 misrepresent the data or calibration of the model was visually accurate since observed and  
11 predicted probabilities were similar **(Figure 1b)**.  
12  
13

14 Validation of the model with the bootstrap technique showed hardly any indication of undue  
15 influence by particular observations, with an optimism coefficient of 0.085, resulting AUC of  
16 0.789 (corrected 95% CI: 0.748–0.83).  
17  
18

19 Using the coefficients ( $\beta$ ) the predicted risk cutoff point was a probability of (SpEqualSe >  
20 0.1320), the model has a sensitivity of 75.74%, specificity of 72.87%, a positive predictive value  
21 of 30.2%, and a negative predictive value of 95.1%.  
22  
23

24 When applying DCA, we first evaluate whether our model understudy has a higher net benefit  
25 than the default strategies (referring all and none). This model outperforms the default strategies  
26 across the relevant threshold range. The model has the highest net benefit across the entire range  
27 of threshold probabilities, which indicates that the model has the highest clinical and public  
28 health value. Hence, referral decision made using the model has a higher net benefit than not  
29 referring at all or referring all regardless of their risk thresholds as shown in **figure (2)**  
30  
31  
32  
33  
34  
35

### 36 **Risk Classification Using a Simplified Risk Score**

37  
38 We created a simplified risk score from the model for practical use. The reduced model's  
39 prediction score was simplified by rounding all regression coefficients. The simplified score had  
40 a considerably comparable prediction accuracy with the original  $\beta$  coefficients, with an AUC of  
41 0.786 (95%CI: 0.729–0.827) **(figure 3)**. The possible minimum and maximum scores a mother  
42 can have are 0 and 11, respectively.  
43  
44  
45

46 When dichotomized to low risk (<3) and high risk ( $\geq 3$ ) based on the risk score, 278 (14.36%)  
47 were categorized as high risk and 982 (77.9%) as low risk for preterm birth. Using “SpEqualSe”,  
48 the suggested threshold score to predict preterm birth using risk scores is  $\geq 3$  with a sensitivity of  
49 75.14 % and specificity of 67.46% **(table 4)**.  
50  
51  
52  
53  
54  
55  
56  
57

**Table 4: Risk classification of preterm birth using simplified prediction score (n = 1260)**

| Score*(risk category) | Prediction Model Based on Maternal Characteristics |                            |
|-----------------------|----------------------------------------------------|----------------------------|
|                       | Number of mothers                                  | Incidence of preterm birth |
| <3 (Low)              | 982 (77.9%)                                        | 72 (7.9%)                  |
| >=3 (High)            | 278 (14.36%)                                       | 97 (53.59%)                |
| Total                 | 1260 (100%)                                        | 169 (13.4%)                |

\*  $Score = (2*PIH) + (3*PROM) + (hemoglobin < 11 \text{ mg/dl}) + 2*residence + (2*APH) + gravidity.$

For peer review only

## Discussion

In this study, the incidence of preterm birth was found to be 13.4%. Maternal characteristics were identified in this retrospective study to build a preterm birth prediction risk score. The optimal combination of maternal factors to predict preterm birth include residency, gravidity, hemoglobin < 11 mg/dl, early rupture of membranes, antepartum hemorrhage, and pregnancy-induced hypertension, according to the prediction model. The model has an AUC of 0.816 (95%CI: 0.776 – 0.856). Predicting the probability of preterm birth in pregnant women is essential to take appropriate measures accordingly. Identifying women at risk of preterm birth is an important task for clinical care providers. However, in low and middle-income countries, there are only a few methods available for reliably predicting actual preterm labor in women. Previously, the focus of the research was to explain the maternal and fetal determinants of preterm birth. In recent years, the focus shifted to predicting preterm birth optimally using a combined set of characteristics.

Without any advanced laboratory or imaging testing, this study measured the predicted performance of a model based on maternal features during pregnancy. Furthermore, we discovered that utilizing SpEqualSe as an optimal cut point, the sensitivity and specificity of this prediction model achieved 75.14 percent and 67.46 percent, respectively, at the score threshold of 3.

In our study, a combination (residency, gravidity, hemoglobin < 11 mg/dl, early rupture of membranes, antepartum hemorrhage, and pregnancy-induced hypertension) of maternal characteristics results in an AUC of 0.816 (95%CI: 0.776 – 0.856), has an excellent accuracy according to diagnostic accuracy classification[38].

A study conducted in China showed that a model developed using advanced maternal age, lower maternal height, history of preterm delivery, amount of vaginal bleeding during pregnancy, and lack of folic acid intake before pregnancy for the prediction of overall preterm birth with AUC of (0.6)[39].

This difference may be due to some of the predictors they used such as lower maternal height, lack of folic acid intake before pregnancy, and advanced maternal age. However predictors they used such as lack of folic acid intake before pregnancy not easily obtainable information in routine clinical practice, which makes their model less practical in our setting. This prediction model constitutes variables that are easily obtainable and have reasonable accuracy to be used by



1  
2  
3 both mid-and lower-level health professionals in the primary care settings. Among the maternal  
4 characteristics included in our model, five can be easily found from history taking and one by  
5 test for hemoglobin.  
6  
7

8 The model's accuracy is consistent with a retrospective study done in China that established a  
9 preterm birth prediction model based on maternal characteristics, including demographics and  
10 clinical characteristics, and a model with predictors (gravidity, educational status, residency,  
11 previous history of preterm birth, twin pregnancy, pre-gestational diabetes mellitus (type I or II),  
12 chronic hypertension, and place of birth) with AUC of 0.749 (95%CI: 0.732–0.767) [40].  
13  
14

15 On the other hand, a model incorporating four predictors (cervical length at admission,  
16 gestational age, amniotic fluid glucose, and IL-6) has an area under the curve (AUROC) of  
17 0.86[41] and similarly, the combination of biophysical, biochemical, immunological,  
18 microbiological, fetal cell, exosomal, or cell-free RNA at different gestational ages, integrated as  
19 part of a multivariable predictor model may be necessary to advance our attempts to predict  
20 sPTL and preterm birth. In the prediction of spontaneous preterm birth within 48 hours, a  
21 prognostic model including qfFN and clinical risk factors showed excellent results[42, 43]. Both  
22 models have higher discriminatory performance. The reason for the lower discriminatory  
23 performance in our study as compared to the studies described above could be because we used  
24 secondary data available from the register and as this dataset is limited and some variables that  
25 require advanced laboratory tests were not included in the model.  
26  
27  
28  
29  
30  
31  
32  
33  
34  
35

36 Hence, predictors necessitate laboratory testing, which is often unavailable in low-resource  
37 settings. As a result, such predictors are difficult to come by in ordinary clinical and public  
38 health practice, making the model less useful.  
39  
40

41 In our prediction score, using 3 as a cutoff point has an acceptable level of specificity,  
42 sensitivity, PPV, and NPV to predict preterm birth. It is also possible to shift the cutoff point to  
43 increase either of the accuracy measures depending on the program aim and availability of  
44 resources.  
45  
46  
47  
48  
49  
50  
51  
52  
53  
54  
55  
56  
57

## Conclusion and recommendation

This study shows the possibility of predicting preterm birth using a simple prediction model constructed from maternal characteristics. Thus, the optimal combination of maternal characteristics such as residence, gravidity, hemoglobin < 11 mg/dl, premature rupture of membrane, antepartum hemorrhage, and pregnancy-induced hypertension shows the possibility of predicting preterm birth using a simple prediction model constructed from maternal characteristics. In addition, risk score calculations based on a combination of predictors were effective and had comparable accuracy with the model-based approach of original  $\beta$  coefficients. This score may assist in clinical decision-making. In addition, incorporating this convenient and easily applicable score in the health care system to be used by clinicians to inform pregnant mothers about the future course of their outcome after external validation. Doing further research is needed to validate the prediction tool using prospective follow-up studies in another context before introducing it to the clinical and public health practices.

### Data Sharing Statement

The data will be available upon request from the corresponding author.

**Author Contributions:** S.F.F. conceived the study and wrote the manuscript. Z.A.A, S.F.F, G.T.W, A.K.Y, and A.M.D, all contribute to data analysis, study design, and supervision of data collection. All authors participated in manuscript revision for intellectual content and approval of the final version. All authors have read and agreed to the published version of the manuscript.

**Funding statement:** This work was supported by Bahir Dar University grant number (2500ETB). This research received no specific grant from any funding agency in the public, commercial or not-for-profit sectors.

**Competing interest's statement:** The author reports no conflicts of interest in this work

## References

1. World Health Organization: **Preterm birth and low birth weight**. 2020.
2. Goldenberg RL, Culhane JF, Iams JD, Romero R. Epidemiology and causes of preterm birth. *Lancet* 2008;371(9606):75e84
3. Althabe F: **Born too soon: the global action report on preterm birth**. World Health Organization; 2012.
4. Liu L, Oza S, Hogan D, Chu Y, Perin J, Zhu J, et al. Global, regional, and national causes of under-5 mortality in 2000-15: an updated systematic analysis with implications for the Sustainable Development Goals. *Lancet*. 2016;388(10063):3027-35.
5. World Health Organization. WHO fact sheet on preterm birth. Available from: <http://www.who.int/mediacentre/factsheets/fs363/en/>
6. World Health Organization: **WHO fact sheet: Preterm birth**. *World Health Organization, Geneva, Switzerland* <http://www.who.int/media/centre/factsheets/fs363/en/> Accessed 2018, 26.
7. <https://reliefweb.int/report/ethiopia/ethiopia-profile-preterm-and-low-birth-weight-prevention-and-care>
8. Rockville (MD): **DHS Program. Mini Ethiopia Demographic and Health Survey**. ICF; 2019– 2019.
9. Li S, Xi B: **Preterm birth is associated with risk of essential hypertension in later life**. *International journal of cardiology* 2014, 172(2):e361-e363.
10. Blencowe H, Cousens S, Chou D, Oestergaard M, Say L, Moller A-B, Kinney M, Lawn J: **Born too soon: the global epidemiology of 15 million preterm births**. *Reproductive health* 2013, 10(S1): S2.
11. Soon BT: **The global action report on preterm birth**. *Geneva: World Health Organization* 2012.
12. Griffin JB, Jobe AH, Rouse D, McClure EM, Goldenberg RL, Kamath-Rayne BD: **Evaluating WHO-recommended interventions for preterm birth: a mathematical model of the potential reduction of preterm mortality in Sub-Saharan Africa**. *Global Health: Science and Practice* 2019, 7(2):215-227.
13. Victora CG, Rubens CE, Group GR: **Global report on preterm birth and stillbirth (4 of 7): delivery of interventions**. *BMC Pregnancy and Childbirth* 2010, 10(S1): S4.
14. Blencowe H, Cousens S, Oestergaard MZ, Chou D, Moller A-B, Narwal R, Adler A, Garcia CV, Rohde S, Say L: **National, regional, and worldwide estimates of preterm birth rates in the year 2010 with time trends since 1990 for selected countries: a systematic analysis and implications**. *The lancet* 2012, 379(9832):2162-2172.
15. Oskovi Kaplan ZA, Ozgur-Erdinc AS: **Prediction of Preterm Birth: Maternal Characteristics, Ultrasound Markers, and Biomarkers: An Updated Overview**. 2018, 2018:8367571.
16. Lucaroni F, Morciano L, Rizzo G: **Biomarkers for predicting spontaneous preterm birth: an umbrella systematic review**. 2018, 31(6):726-734.
17. Lee KA, Chang MH, Park M-H, Park H, Ha EH, Park EA, Kim YJ: **A model for prediction of spontaneous preterm birth in asymptomatic women**. *Journal of Women's Health* 2011, 20(12):1825-1831.

18. Georgiou HM, Di Quinzio MK, Permezel M, Brennecke SP: **Predicting preterm labour: current status and future prospects.** *Disease markers* 2015, **2015**.
19. Shennan AH: **Prediction and prevention of preterm birth: a quagmire of evidence.** *Ultrasound Obstet Gynecol* 2018, **51(5)**:569-570.
20. Son M, Miller ES: **Predicting preterm birth: Cervical length and fetal fibronectin.** *Semin Perinatol* 2017, **41(8)**:445-451.
21. York TP, Strauss III JF, Neale MC, Eaves LJ: **Racial differences in genetic and environmental risk to preterm birth.** *PloS one* 2010, **5(8)**:e12391.
22. Culhane JF, Goldenberg RL: **Racial disparities in preterm birth.** In: *Seminars in perinatology: 2011*: Elsevier; 2011: 234-239.
23. Raglan GB, Lannon SM, Jones KM, Schulkin J: **Racial and ethnic disparities in preterm birth among American Indian and Alaska Native women.** *Maternal and child health journal* 2016, **20(1)**:16-24.
24. Koullali B, Oudijk M, Nijman T, Mol B, Pajkrt E: **Risk assessment and management to prevent preterm birth.** In: *Seminars in Fetal and Neonatal Medicine: 2016*: Elsevier; 2016: 80-88.
25. Peduzzi P, Concato J, Kemper E, Holford TR, Feinstein AR: **A simulation study of the number of events per variable in logistic regression analysis.** *Journal of clinical epidemiology* 1996, **49(12)**:1373-1379.
26. Mekonen DG, Yismaw AE, Nigussie TS, Ambaw WM: **Proportion of Preterm birth and associated factors among mothers who gave birth in Debretabor town health institutions, northwest, Ethiopia.** *BMC Research Notes* 2019, **12(1)**:2.
27. Tigist B, Abdela A, Zenebe G: **Preterm birth and associated factors among mothers who gave birth in Debre Markos Town Health Institutions.** *Institutional Based Cross sectional study* 2013.
28. Rosenberg RE, Ahmed ANU, Ahmed S, Saha SK, Chowdhury MA, Black RE, Santosham M, Darmstadt GL: **Determining gestational age in a low-resource setting: validity of last menstrual period.** *Journal of health, population, and nutrition* 2009, **27(3)**:332.
29. Wassie M, Manaye Y, Abeje G, Tifrie M, Worku G: **Determinants of Preterm Birth among Newborns Delivered in Bahir Dar City Public Hospitals, North West Ethiopia.** 2020.
30. Woday A, Muluneh MD, Sherif S: **Determinants of preterm birth among mothers who gave birth at public hospitals in the Amhara region, Ethiopia: A case-control study.** *PloS one* 2019, **14(11)**:e0225060.
31. Wudie F, Tesfamicheal F, Fisseha H, Weldehawaria N, Misgena K, Alema H, Gebregziabher Y, Fisseha G, Woldu M: **Determinants of preterm delivery in the central zone of Tigray, northern Ethiopia: A case-control study.** *South African Journal of Child Health* 2019, **13(3)**:108-114.
32. Woldeyohannes D, Kene C, Gomora D, Seyoum K, Assefa T: **Factors Associated with Preterm Birth among Mothers Who gave Birth in Dodola Town Hospitals, Southeast Ethiopia: Institutional Based Cross-Sectional Study.** *Clinics Mother Child Health* 2019, **16(317)**:2.
33. Muchie KF, Lakew AM, Teshome DF, Yenit MK, Sisay MM, Mekonnen FA, Habitu YA: **Epidemiology of preterm birth in Ethiopia: systematic review and meta-analysis.** *BMC pregnancy and childbirth* 2020, **20(1)**:1-12.

- 1  
2  
3 34. Kwak SK, Kim JH: **Statistical data preparation: management of missing values and outliers.** *Korean Journal of anesthesiology* 2017, **70**(4):407.
- 4  
5 35. Grobbee DE, Hoes AW. *Clinical epidemiology: principles, methods, and applications for clinical research*: Jones & Bartlett Publishers; 2014.
- 6  
7 36. Moons KGM, Kengne AP, Woodward M, et al. Risk prediction models: I. Development, internal validation, and assessing the incremental value of a new (bio)marker. *Heart* 2012;98:683-90. [Crossref] [PubMed]
- 8  
9  
10  
11 37. Vickers AJ, Elkin EB: **Decision curve analysis: a novel method for evaluating prediction models.** *Medical decision making: an international journal of the Society for Medical Decision Making* 2006, **26**(6):565-574.
- 12  
13  
14 38. Mandrekar JN: **Receiver Operating Characteristic Curve in Diagnostic Test Assessment.** *Journal of Thoracic Oncology* 2010, **5**(9):1315-1316.
- 15  
16  
17 39. He J-R, Ramakrishnan R, Lai Y-M, Li W-D, Zhao X, Hu Y, Chen N-N, Hu F, Lu J-H, Wei X-L: **Predictions of preterm birth from early pregnancy characteristics: born in Guangzhou cohort study.** *Journal of clinical medicine* 2018, **7**(8):185.
- 18  
19  
20  
21 40. Chen M, Xie N, Liang Z, Qian T, Chen D: **Early Prediction Model for Preterm Birth Combining Demographic Characteristics and Clinical Characteristics.** 2020.
- 22  
23 41. Cobo T, Aldecoa V, Figueras F, Herranz A, Ferrero S, Izquierdo M, Murillo C, Amoedo R, Rueda C, Bosch J: **Development and validation of a multivariable prediction model of spontaneous preterm delivery and microbial invasion of the amniotic cavity in women with preterm labor.** *American Journal of Obstetrics and Gynecology* 2020.
- 24  
25  
26  
27  
28 42. Lamont R, Richardson L, Boniface J, Cobo T, Exner M, Christensen I, Forslund S, Gaba A, Helmer H, Jørgensen J: **Commentary on a combined approach to the problem of developing biomarkers for the prediction of spontaneous preterm labor that leads to preterm birth.** *Placenta* 2020.
- 29  
30  
31  
32  
33 43. Stock SJ, Horne M, Bruijn M, Morris R, Dorling J, Jackson L, Chandiramani M, David AL, Khalil A, Shennan A: **793: A new prediction model for birth within 48 hours in women with preterm labour symptoms.** *American Journal of Obstetrics & Gynecology* 2020, **222**(1): S502.
- 34  
35  
36  
37  
38  
39  
40  
41  
42  
43  
44  
45  
46  
47  
48  
49  
50  
51  
52  
53  
54  
55  
56  
57

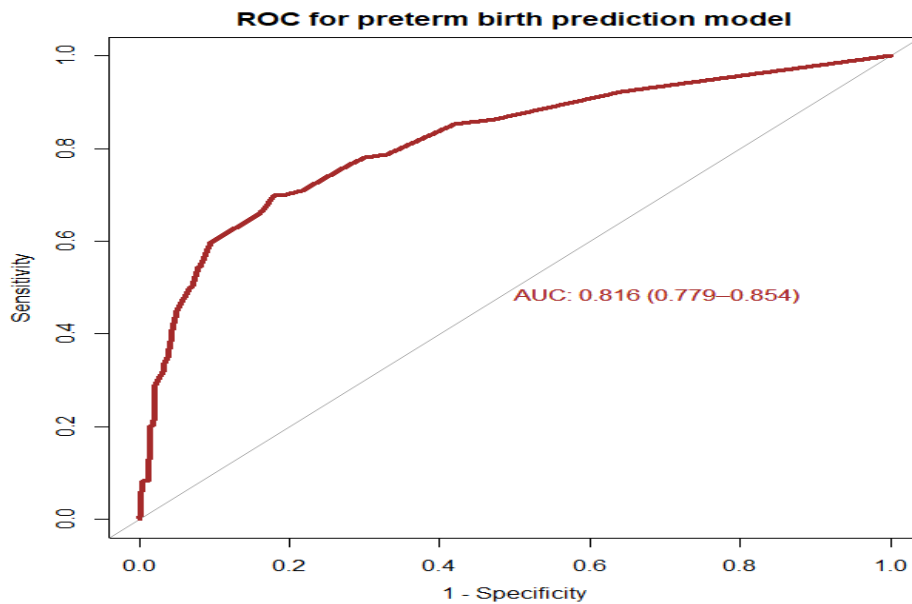

a)

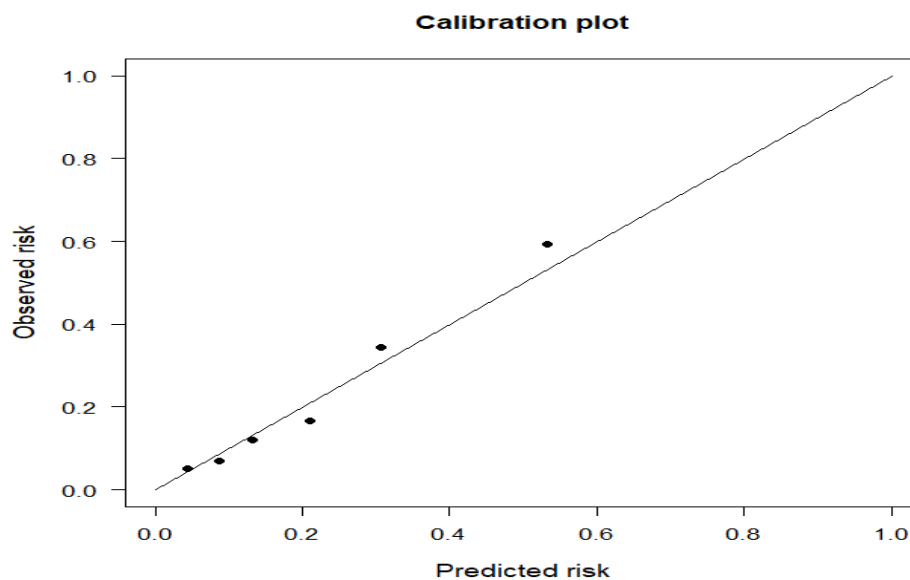

b)

46  
47  
48  
49  
50  
51  
52  
53  
54  
55  
56  
57  
58  
59  
60

Figure 1: (a) Area under the ROC curve for the prediction model, and (b) Predicted versus observed preterm birth probability in the sample. This analysis includes mothers who gave birth at FHCSH from January 30/2019 to January 30/2021(n = 1260). Calibration plot created using “plot Calibration” in R programming.

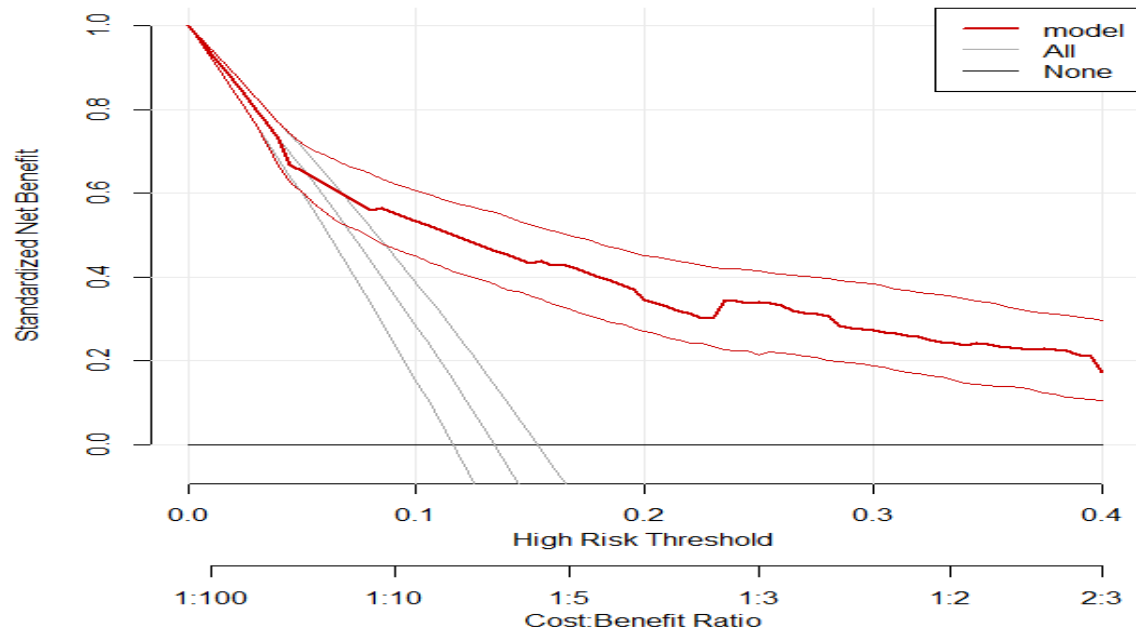

Figure 2: A decision curve plotting showing the net benefit of the model against threshold probability.

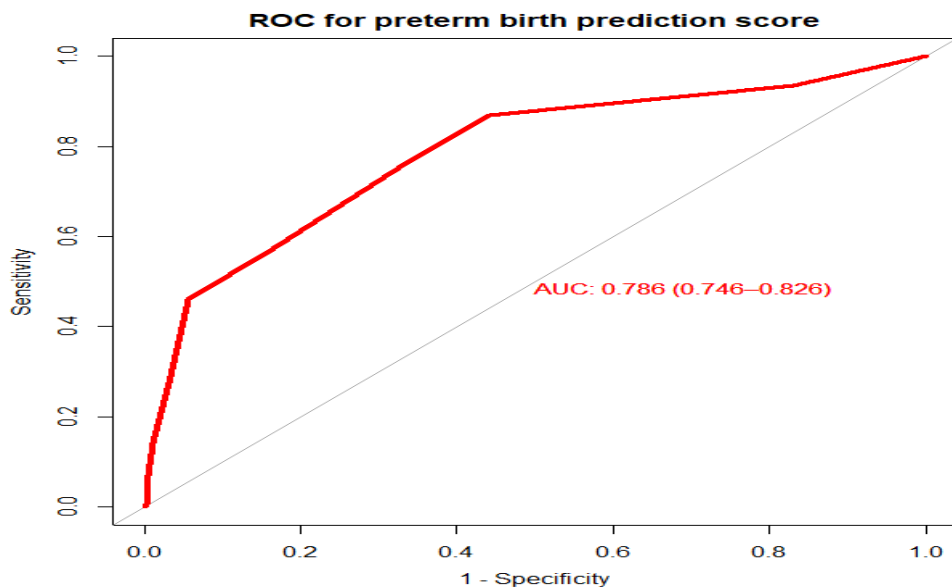

Figure 3: Area under the ROC curve for the simplified risk score to predict the risk of preterm birth among mothers who gave birth at FHCSH from January 30/2019 to January 30/2021.



# BMJ Open

## Developing and validating risk prediction model for preterm birth at Felege Hiwot comprehensive specialized hospital, Northwest Ethiopia: A retrospective follow-up study

|                                 |                                                                                                                                                                                                                                                                                                                                                                                                     |
|---------------------------------|-----------------------------------------------------------------------------------------------------------------------------------------------------------------------------------------------------------------------------------------------------------------------------------------------------------------------------------------------------------------------------------------------------|
| Journal:                        | <i>BMJ Open</i>                                                                                                                                                                                                                                                                                                                                                                                     |
| Manuscript ID                   | bmjopen-2022-061061.R1                                                                                                                                                                                                                                                                                                                                                                              |
| Article Type:                   | Original research                                                                                                                                                                                                                                                                                                                                                                                   |
| Date Submitted by the Author:   | 16-Jul-2022                                                                                                                                                                                                                                                                                                                                                                                         |
| Complete List of Authors:       | Feleke, Sefineh; Woldia University, Public health Anteneh, Zelalem; Bahir Dar University College of Medical and Health Sciences, Epidemiology<br>Wassie, Gizachew; Bahir Dar University College of Medical and Health Sciences, Epidemiology and Biostatistics<br>Yalew, Anteneh ; Wolkite University, Department of Public Health<br>Mengist, Anteneh; Debre Tabor University, Reproductive Health |
| <b>Primary Subject Heading</b>: | Research methods                                                                                                                                                                                                                                                                                                                                                                                    |
| Secondary Subject Heading:      | Obstetrics and gynaecology, Public health, Evidence based practice, Paediatrics, Diagnostics                                                                                                                                                                                                                                                                                                        |
| Keywords:                       | OBSTETRICS, PUBLIC HEALTH, PERINATOLOGY                                                                                                                                                                                                                                                                                                                                                             |
|                                 |                                                                                                                                                                                                                                                                                                                                                                                                     |

SCHOLARONE™  
Manuscripts



I, the Submitting Author has the right to grant and does grant on behalf of all authors of the Work (as defined in the below author licence), an exclusive licence and/or a non-exclusive licence for contributions from authors who are: i) UK Crown employees; ii) where BMJ has agreed a CC-BY licence shall apply, and/or iii) in accordance with the terms applicable for US Federal Government officers or employees acting as part of their official duties; on a worldwide, perpetual, irrevocable, royalty-free basis to BMJ Publishing Group Ltd ("BMJ") its licensees and where the relevant Journal is co-owned by BMJ to the co-owners of the Journal, to publish the Work in this journal and any other BMJ products and to exploit all rights, as set out in our [licence](#).

The Submitting Author accepts and understands that any supply made under these terms is made by BMJ to the Submitting Author unless you are acting as an employee on behalf of your employer or a postgraduate student of an affiliated institution which is paying any applicable article publishing charge ("APC") for Open Access articles. Where the Submitting Author wishes to make the Work available on an Open Access basis (and intends to pay the relevant APC), the terms of reuse of such Open Access shall be governed by a Creative Commons licence – details of these licences and which [Creative Commons](#) licence will apply to this Work are set out in our licence referred to above.

Other than as permitted in any relevant BMJ Author's Self Archiving Policies, I confirm this Work has not been accepted for publication elsewhere, is not being considered for publication elsewhere and does not duplicate material already published. I confirm all authors consent to publication of this Work and authorise the granting of this licence.

1  
2  
3  
4 1  
5 2 Developing and validating risk prediction model for preterm birth at Felege  
6 3 Hiwot comprehensive specialized hospital, Northwest Ethiopia: A retrospective  
7 4 follow-up study  
8  
9

10 4  
11 5 Sefineh F.Feleke\*<sup>1</sup>, Zelalem A.Anteneh<sup>2</sup>, Gizachew T.Wassie<sup>2</sup>, Anteneh K. Yalew<sup>3</sup>, Anteneh  
12 6 M.Dessie<sup>4</sup>

- 13  
14  
15 7 1. Woldia University, Collage of Health Science, Department of Public Health  
16 8 2. Bahir Dar University, College of Medicine and Health Science, School of Public Health,  
17 9 Department of Epidemiology and Biostatistics  
18 10 3. Wolkite University, Collage of Health Science, Department of Public Health  
19 11 4. Debre Tabor University, Collage of Health Science, Department of Public Health

20 12 \*Correspondence: [Sefineh Fenta](#)

21 13 Email address: [fentasefineh21@gmail.com](mailto:fentasefineh21@gmail.com)

22 14 Phone number: +251928573882  
23  
24  
25  
26  
27  
28  
29  
30  
31  
32  
33  
34  
35  
36  
37  
38  
39  
40  
41  
42  
43  
44  
45  
46  
47  
48  
49  
50  
51  
52  
53  
54  
55  
56  
57

## 29 Abstract

30 **Objective:** To develop and validate a risk prediction model for the prediction of preterm birth  
31 using maternal characteristics.

32 **Design:** A retrospective follow-up study was conducted. Data were coded and entered into  
33 Epidata, version 3.02, and were analyzed by using R statistical programming language version  
34 4.0.4 for further processing and analysis. Bivariable logistic regression was done to identify the  
35 relationship between each predictor and preterm birth. Variables with ( $p \leq 0.25$ ) from the  
36 bivariable analysis were entered into a backward stepwise multivariable logistic regression  
37 model, and significant variables ( $p < 0.05$ ) were retained in the multivariable model. Model  
38 accuracy and goodness of fit were assessed by computing the area under the ROC curve  
39 (discrimination) and calibration plot (calibration) respectively.

40 **Setting and participants:** This retrospective study was conducted among 1260 pregnant women  
41 who did prenatal care and finally delivered at Felege Hiwot Comprehensive Specialized  
42 Hospital, Bahir Dar city, Northwest Ethiopia from January 30, 2019, to January 30, 2021.

43 **Results:** Residence, gravidity, haemoglobin  $< 11$  mg/dl, early rupture of membranes, antepartum  
44 haemorrhage, and pregnancy-induced hypertension remained in the final multivariable prediction  
45 model. The AUC of the model was 0.816 (95% confidence interval: 0.779 – 0.856).

46 **Conclusion:** This study showed the possibility of predicting preterm birth using maternal  
47 characteristics during pregnancy. Thus, using this model could help to identify pregnant women  
48 at a higher risk of having a preterm birth to be linked to a center

49 **Keywords:** Prediction Model, Preterm birth, Risk score, Ethiopia

### 50 Strength and Limitations of the study

- 51 ✓ An adequate number of participants with the outcome helped us to construct the  
52 model using a sufficient number of predictor variables and inclusion of sensitivity  
53 analyses.
- 54 ✓ Multiple imputations was used to address missing data, which has been shown to be a  
55 valid technique for dealing with missing data within logistic regression models, resulting  
56 in less bias than excluding all women with missing data[1].
- 57 ✓ The prediction model is constructed from easily obtainable maternal characteristics that  
58 make it applicable in primary care settings.

- 1  
2  
3 59 ✓ A single-site study, it is confined to a single area, which needs external validation before  
4 using it in another context.  
5  
6 61 ✓ Furthermore, data were collected from each mother's card; due to this, some important  
7 variables were missed, such as previously highlighted factors with preterm birth in  
8 different studies.  
9  
10  
11  
12  
13

## 14 65 **Introduction**

15  
16 66 Preterm birth is described as babies that are born alive before the end of 37 weeks of  
17 pregnancy[2]. Preterm birth can be accidental (due to spontaneous preterm labor and/or preterm  
18 membrane rupture) or induced by the provider (by cesarean or labor induction)[3]. Most preterm  
19 births happen spontaneously[4].  
20  
21

22  
23 70 An estimated 15 million babies worldwide are born too early per year. That's more than 1 in 10  
24 infants. About 1 million newborns die per year because of preterm birth complications[5].  
25

26 72 Across 184 countries, the rate of preterm birth ranges from 5% to 18% of babies born [6].  
27  
28 73 However, there are stark disparities in survival rates around the world. Half of the babies born at  
29 or below 32 weeks die in low-income settings due to a lack of practical, cost-effective, and  
30 critical care, such as comfort, breastfeeding assistance, basic infection care, and trouble  
31 Breathing[7].  
32  
33

34  
35 77 Furthermore, the effect of preterm birth is also prolonged beyond the neonatal phase and  
36 throughout life[8]. Hence, the largest risk of severe health issues, including cerebral palsy,  
37 intellectual disability, chronic lung disease, and vision and hearing loss, is faced by babies born  
38 before maturity. This introduces a lifelong disability dimension. At some point in their lives,  
39 most people will face the struggles and potential disasters of preterm birth either directly in their  
40 families or indirectly through events for the nations[8, 9].  
41  
42

43  
44 82 To alleviate this burden in the past few decades, numerous methods have been attempted  
45 internationally, including in Ethiopia, to prevent and enhance the treatment of preterm births [10-  
46 12]. As part of the strategy, it is essential to diagnose or predict preterm birth earlier in  
47 pregnancy to take appropriate measures for high-risk groups.  
48  
49

50  
51 86 However, in most nations, predicting preterm birth is still largely based on subjective clinical  
52 experience. This approach may increase unnecessary hospital admissions and unnecessary but  
53  
54  
55  
56  
57

89 potentially harmful treatments, such as the use of steroids for the maturation of the fetal lung and  
90 tocolysis[13, 14]

91 There were clinical prediction models that aim to estimate the likelihood of preterm birth that  
92 include laboratory tests that are typically inaccessible in low-resource settings, such as fetal  
93 fibronectin, insulin-like growth factor binding protein-1 (IGFBP-1), interleukin-6, and placental  
94 alpha-macroglobulin-1[15-20].

95 Although there were prediction models for preterm birth, variation in the occurrence of preterm  
96 birth globally is relevant, indicating variations in exposure to psychosocial, sociodemographic,  
97 and medical risk factors and genetic differences [21-23].

98 Hence, because of limited resources, the use of easily accessible data to forecast preterm birth  
99 seems to be appealing in low- and middle-income areas.

100 Therefore, developing and validating a risk prediction model for prediction of preterm birth  
101 using maternal(clinical and non-clinical) characteristics based on the available measurement is  
102 paramount to allow early preterm birth intervention such as utero transfer to tertiary care centers,  
103 appropriate corticosteroid administration while preventing excessive use, neuroprotective  
104 magnesium sulfate therapy, and antibiotic treatment in the event of infection[15, 24]

## 105 **Methods and Materials**

### 106 **Study setting**

107 This retrospective study was conducted among 1260 pregnant women who did prenatal care and  
108 finally delivered at Felege Hiwot Comprehensive Specialized Hospital, Bahir Dar city,  
109 Northwest Ethiopia from January 30, 2019, to January 30, 2021. Bahir Dar is the capital city of  
110 Amhara national regional state and is found 575 km northwest of Addis Ababa.  
111 The hospital has currently a total of 1431 manpower (5 Obstetricians and Gynaecologists and 63  
112 midwives among others) in different disciplines. It has a total of 500 formal beds, 11 wards  
113 (emergency ward and Inpatient wards such as Gynecological & Obstetric, Surgical, Orthopaedics,  
114 Medical, Pediatric, L&D, Eye unit, NICU, psychiatric, oncology, and 22 OPDS), 39 clinical and  
115 non-clinical departments /service units / providing laboratory, Diagnostic, curative &  
116 Rehabilitation service at outpatient & inpatient bases as well as disease prevention & health  
117 promotion services.

### 121 **Sample size determination**

122 The sample size required for model development was determined based on the minimum  
123 standard of 10 events per candidate predictor considered, according to the formula  $N = (n \times 10)/I$   
124 where  $N$  is the sample size,  $n$  is the number of candidate predictor variables and  $I$  is the  
125 estimated event rate in the population[25]. Since there were 17 candidate predictors considered  
126 and 10 events per candidate predictor, the estimated number of events for the study was 170.  
127 Based on a study done on the prevalence of preterm birth in Debre Tabor hospital was 13%[26],  
128 so taking into account this the required sample size was calculated as follows,  $n = 170 \times 100 / 13 =$   
129 1308.

### 130 **Study Design and Participants**

131 The theoretical design of the present study was; the incidence of preterm birth as a function of  
132 multiple predictors during pregnancy. The source population of the study was all pregnant  
133 mothers who gave birth at FHCSH. To be included in this study, mothers must meet all of the  
134 following eligibility criteria; All medical records of mothers who gave live birth and had at least  
135 one ANC follow-up in FHCSH from January 30/2019 to January 30/2021.

### 136 **Sampling method and procedures**

137 A simple random sampling technique was employed to select participants using the medical  
138 registration number of a delivered mother from the delivery registration book. First, all mother  
139 delivered at FHCSH in the last two years was identified from the delivery registration book.  
140 After that records of mothers who meet the inclusion criteria were included in the study.  
141 Subsequently, a sampling frame was prepared. Finally, the study unit was selected by using a  
142 computer-generated random number.

### 143 **Data Collection**

144 Outcome assessment: The outcome variable was attributed to women whose medical records  
145 indicated a physician or midwife diagnosis of preterm birth and delivery between 28 and 36  
146 completed weeks of gestation. The gestational age (GA) was measured using either LNMP,  
147 which is found to be a more reliable measure of GA in a low-resource setting[27, 28], or an early  
148 ultrasound result(12 weeks).

149 Predictor assessment: Data were collected using a structured checklist through chart review.  
150 Checklists were developed after reviewing various relevant literatures [29-33]. It consists of  
151 socio-demographic (Maternal age, Residence), Maternal obstetric characteristics : (History of

152 preterm birth, History of abortion, history of stillbirth gravidity, Parity, Multiple pregnancy,  
 153 APH, PROM, Gestational DM, and PIH), Maternal medical condition : (HGB level, Diabetic  
 154 Mellitus, Chronic Hypertension, UTI and HIV).

155

### 156 **Quality Assurance Mechanisms**

157 To maintain the quality of data, the data collectors and supervisors were trained for a day on the  
 158 objective of the study, the content of the checklists, how to fill the checklists. Afterward,  
 159 reviewing 15 charts on medical records of mothers who gave birth at Felege Hiwot  
 160 Comprehensive Specialized Hospital which is found in Northwest Ethiopia were done. After  
 161 that, some adjustments (removing variables that were not available in medical record of mothers)  
 162 were done accordingly. The checklist was developed in English.

### 163 **Data Processing and Analysis**

164 Data were entered into a software application (EPI DATA, version 3.02) and was analyzed by  
 165 using R statistical programming language version 4.0.4 for further processing and analysis.  
 166 There were 13(1%), 2(0.2 %), 11 (0.9 %),15 (2.5%), 21 (1.7%) ,29(2.3%),20(1.6%) and 20  
 167 (1.6%) missing values for premature rupture of membranes , residence, chronic hypertension,  
 168 multiple pregnancy gestational diabetes Mellitus, pregnancy-induced hypertension ,antepartum  
 169 hemorrhage and hemoglobin respectively.

170 We assumed data were missing at random, and we, therefore, performed a multivariate  
 171 imputation by chained equations for all variables evaluated in the prediction model [34].  
 172 Sensitivity analysis was performed to assess whether the assumption of missing at random  
 173 (MAR) is valid or not, and the results were reasonably comparable table (1). Descriptive  
 174 statistics including median, inter-quartile range (IQR), and percentages, were carried out.

175 **Table 1. Sensitivity analysis of the model to predict preterm birth: Comparison of the**  
 176 **regression coefficients, standard errors (SE), and p-values for complete case analysis**  
 177 **(CCA) and multiple imputed data (MI).**

| 178 <b>Predictor variables</b>        | 179 <b>Complete case analysis</b> |            |             | 180 <b>Multiple imputations</b> |            |             |
|---------------------------------------|-----------------------------------|------------|-------------|---------------------------------|------------|-------------|
|                                       | 181 B                             | 182 SE     | 183 P value | 184 B                           | 185 SE     | 186 P value |
| 187 Chronic hypertension<br>188 (yes) | 189 0.7313                        | 190 0.6297 | 191 0.24    | 192 0.581                       | 193 0.6285 | 194 0.92    |



|                          |       |        |        |       |        |        |
|--------------------------|-------|--------|--------|-------|--------|--------|
| Residence (rural)        | 0.815 | 0.1946 | <0.001 | 1.154 | 0.1958 | <0.001 |
| GDM(yes )                | 0.709 | 0.4028 | 0.07   | 0.472 | 0.4236 | 0.26   |
| HGB(<11g/dl)             | 0.497 | 0.2185 | 0.02   | 0.642 | 0.2153 | 0.001  |
| PROM (yes)               | 1.898 | 0.2080 | <0.001 | 2.097 | 0.2129 | <0.001 |
| APH (yes)                | 1.194 | 0.2858 | <0.001 | 1.298 | 0.2874 | <0.001 |
| PIH (yes)                | 1.353 | 0.2600 | <0.001 | 1.368 | 0.2523 | <0.001 |
| Multiple pregnancy (yes) | 0.539 | 0.3173 | 0.08   | 0.446 | 0.3257 | 0.17   |
| Gravidity(primigravida)  | 0.426 | 0.1944 | 0.02   | 0.711 | 0.1976 | <0.001 |

178

### 179 Model Development and Validation

180 For model development, bivariable logistic regression was done to obtain insight into the  
 181 association between each potential predictor and preterm birth. Variables with ( $p \leq 0.25$ ) from  
 182 the bivariable analysis were entered into a backward stepwise multivariable logistic regression  
 183 model, and significant variables ( $p < 0.05$ ) were retained in the multivariable model. The results  
 184 of significant predictors were reported as coefficients with 95% confidence intervals (CI). To  
 185 check for the model accuracy and goodness of fit, we computed the area under the ROC curve  
 186 (discrimination) and calibration plot (calibration) using “classifierplots” and “givitiR” packages  
 187 of R respectively. The AUC ranged from 0.5 (no predictive ability) to 1 (perfect  
 188 discrimination)[35]. The regression coefficients and their 95% confidence levels, and the AUC  
 189 were adjusted for overfitting or over-optimism using bootstrapping technique. To make internal  
 190 validation, we computed 1000 random bootstrap [36]samples with the replacement on all  
 191 predictors in the data. The model’s predictive performance after bootstrapping is considered as  
 192 the performance that can be expected when the model is applied to future similar populations. To  
 193 evaluate the clinical and public health impact of the model, we performed a decision curve  
 194 analysis (DCA) [37] of standardized net benefit across a range of threshold probabilities (0 to 1).  
 195 In the DCA, the model was compared against two extreme scenarios; “intervention for all” and  
 196 “no intervention”. In our case, the intervention considered is the referral of high-risk pregnant  
 197 women to facilities where appropriate corticosteroid administration, antibiotic treatment.

198

199

200

### 201 **Risk Score Development**

202 To construct an easily applicable preterm birth prediction score, we transformed each coefficient  
203 from the model into a rounded number by dividing it by the lowest coefficient. The number of  
204 points was subsequently rounded to the nearest integer. We determined the total score for each  
205 individual by assigning the points for each variable present and adding them up. The score was  
206 transformed to a dichotomous, allowing each pregnant woman to be classified as having a high  
207 or low risk of preterm birth. The receiver operating characteristic curve (ROC) was plotted and  
208 the area under the curve (AUC) was calculated to measure the discriminatory power of the  
209 scoring system.

### 210 **Patient and public involvement**

211 There was no direct interaction with patients in this study and no direct patient involvement in  
212 the design or conduct of this study.

213

214

215

216

217

218

219

220

221

222

223

224

225

226

227

228

## 229 Result

### 230 Demographic, Obstetric, and Clinical Characteristics of mothers

231 A total of 1260 study cards were reviewed from a sample of 1308, about 48 cards were not  
 232 reviewed due to the outcome of intrauterine fetal death, and abortion. Table (2) shows the  
 233 demographic, obstetric, and clinical characteristics of mothers who gave birth included in the  
 234 analysis. The median age of the study participants was 26 years with IQR (24-30years); the  
 235 majority of the participants 1086 (86.2%) were in the age group of 20-34 years.  
 236 More than three fourth of the participants 926 (73.49%) were urban residents. Of the total of  
 237 mothers who delivered at FHCSH, more than two-thirds of 841 (66.7%) were multigravida.  
 238 About parity, above half of them 713 (56.6%) were multipara. Concerning past obstetric history,  
 239 55 (6.5%) of them had a history of previous preterm birth, 76 (9%) of them had a previous  
 240 history of stillbirth and 162 (19.3%) of them had a previous history of abortion.

241 **Table 2. Demographic, obstetric, and clinical characteristics of mothers who gave birth at**  
 242 **FHCSH , Northwest Ethiopia, 2021.**

| Characteristics      | Category     | Frequency | Percent |
|----------------------|--------------|-----------|---------|
| Gravidity            | Primigravida | 419       | 33.3    |
|                      | Multigravida | 841       | 66.7    |
| Residence            | Urban        | 926       | 73.5    |
|                      | Rural        | 334       | 26.5    |
| GDM                  | Yes          | 44        | 3.5     |
|                      | No           | 1216      | 96.5    |
| APH                  | Yes          | 84        | 6.7     |
|                      | No           | 1176      | 93.3    |
| PIH                  | Yes          | 110       | 8.73    |
|                      | No           | 1150      | 91.27   |
| HGB level            | <11d/dl      | 236       | 18.7    |
|                      | >=11g/dl     | 1024      | 81.3    |
| Chronic hypertension | Yes          | 21        | 1.7     |
|                      | No           | 1239      | 98.3    |
| PROM                 | Yes          | 195       | 15.5    |

|                      |     |      |      |
|----------------------|-----|------|------|
|                      | No  | 1065 | 84.5 |
| Multiple pregnancies | Yes | 90   | 7.2  |
|                      | No  | 1170 | 92.8 |

243 *PROM: Premature rupture of membrane, HGB: hemoglobin, PIH: pregnancy-induced*  
 244 *hypertension, APH: antepartum hemorrhage, GDM: gestational diabetes mellitus*

245

### 246 **Development of prediction model for preterm birth**

247 Out of 1260 delivered neonates, 169 (13.4%) (95%, CI (11.6%, 15.4%) was preterm infants.

248 The bivariable logistic regression analysis found several factors were eligible to be included in  
 249 the prediction model. These variables were haemoglobin level, Gravidity, residence, gestational  
 250 diabetes mellitus, APH, PIH, chronic hypertension, PROM, and multiple pregnancies. Using the  
 251 results, a prediction model was developed an equation for the prediction model was obtained  
 252 table (3).

253 **Table 3: Coefficients and risk-scores of each predictor included in the model to predict**  
 254 **preterm birth ( $n = 1260$ )**

| Predictors<br>Variables*    | Multivariable analysis        |                   |             |               |
|-----------------------------|-------------------------------|-------------------|-------------|---------------|
|                             | Original $\beta$<br>(95 % CI) | Bootstrap $\beta$ | P-<br>value | Risk<br>score |
| Residence<br>(rural)        | 1.161 ( 0.780, 1.545 )        | 1.148             | <0.001      | 2             |
| Gravidity<br>(primigravida) | 0.675 ( 0.291, 1.061 )        | 0.666             | 0.01        | 1             |
| PROM (yes)                  | 2.081 ( 1.669 , 2.50 )        | 2.051             | <0.001      | 3             |
| APH (yes)                   | 1.364 ( 0.806 , 1.915 )       | 1.348             | <0.001      | 2             |
| PIH (yes)                   | 1.387 ( 0.887 , 1.879 )       | 1.368             | <0.001      | 2             |
| HGB <11g/dl                 | 0.676 ( 0.255 , 1.09 )        | 0.677             | <0.001      | 1             |

255 *\*Variables retained in the reduced model are; residence, APH, hemoglobin, PIH, gravidity, and PROM.*  
 256 *Both backward and forward selection showed the same results.  $\beta$  after internal validation with*  
 257 *bootstrapping is shown. Simplified risk score: we divided the coefficient of predictors included in the*

reduced model by the smallest (0.666). The probability or risk of preterm birth =  $1 / (1 + \exp(-3.517 + 1.148 * \text{Residence (rural)} + 0.666 * \text{gravity (primigravida)} + 2.051 * \text{PROM (yes)} + 1.348 * \text{APH (yes)} + 1.387 * \text{PIH} + 0.677 * \text{HGB (<11g/dl)}))$ .

The AUC of the final reduced model was 0.816 (95% confidence interval: 0.779 – 0.856) (**Figure 1a**). The calibration test had a p-value of 0.492, indicating that the model does not misrepresent the data or calibration of the model was visually accurate since observed and predicted probabilities were similar (**Figure 1b**).

Validation of the model with the bootstrap technique showed hardly any indication of undue influence by particular observations, with an optimism coefficient of 0.085, resulting AUC of 0.789 (corrected 95% CI: 0.748–0.83).

Using the coefficients ( $\beta$ ) the predicted risk cutoff point was a probability of (SpEqualSe > 0.1320), the model has a sensitivity of 75.74%, specificity of 72.87%, a positive predictive value of 30.2%, and a negative predictive value of 95.1%.

When applying DCA, we first evaluate whether our model understudy has a higher net benefit than the default strategies (referring all and none). This model outperforms the default strategies across the relevant threshold range. The model has the highest net benefit across the entire range of threshold probabilities, which indicates that the model has the highest clinical and public health value. Hence, referral decision made using the model has a higher net benefit than not referring at all or referring all regardless of their risk thresholds as shown in *figure (2)*.

### **Risk Classification Using a Simplified Risk Score**

We created a simplified risk score from the model for practical use. The reduced model's prediction score was simplified by rounding all regression coefficients. The simplified score had a considerably comparable prediction accuracy with the original  $\beta$  coefficients, with an AUC of 0.786 (95%CI: 0.729–0.827) (**figure 3**). The possible minimum and maximum scores a mother can have are 0 and 11, respectively.

Using “SpEqualSe”, the suggested threshold score to predict preterm birth using risk scores is  $\geq 3$  with a sensitivity of 75.14 % and specificity of 67.46% table (4).

When dichotomized to low risk (<3) and high risk ( $\geq 3$ ) based on the risk score, 278 (14.36%) were categorized as high risk and 982 (77.9%) as low risk for preterm birth.

**Table 4: Risk classification of preterm birth using simplified prediction score (n = 1260)**

| Score*(risk | Prediction Model Based on Maternal Characteristics |
|-------------|----------------------------------------------------|
|-------------|----------------------------------------------------|

| category)  | Number of mothers | Incidence of preterm birth |
|------------|-------------------|----------------------------|
| <3 (Low)   | 982 (77.9%)       | 72 (7.9%)                  |
| >=3 (High) | 278 (14.36%)      | 97 (53.59%)                |
| Total      | 1260 (100%)       | 169 (13.4%)                |

\*  $Score = (2*PIH) + (3*PROM) + (hemoglobin < 11 \text{ mg/dl}) + 2*residence + (2*APH) +$   
*gravidity.*

## Discussion

In this study, the incidence of preterm birth was found to be 13.4%. Maternal characteristics were identified in this retrospective study to build a preterm birth prediction risk score. The optimal combination of maternal factors to predict preterm birth include residency, gravidity, hemoglobin < 11 mg/dl, early rupture of membranes, antepartum hemorrhage, and pregnancy-induced hypertension, according to the prediction model. The model has an AUC of 0.816 (95%CI: 0.776 – 0.856). Predicting the probability of preterm birth in pregnant women is essential to take appropriate measures accordingly. Identifying women at risk of preterm birth is an important task for clinical care providers. However, in low and middle-income countries, there are only a few methods available for reliably predicting actual preterm labor in women. Previously, the focus of the research was to explain the maternal and fetal determinants of preterm birth. In recent years, the focus shifted to predicting preterm birth optimally using a combined set of characteristics.

Without any advanced laboratory or imaging testing, this study measured the predicted performance of a model based on maternal features during pregnancy. Furthermore, we discovered that utilizing SpEqualSe as an optimal cut point, the sensitivity and specificity of this prediction model achieved 75.14 percent and 67.46 percent, respectively, at the score threshold of 3.

In our study, a combination (residency, gravidity, hemoglobin < 11 mg/dl, early rupture of membranes, antepartum hemorrhage, and pregnancy-induced hypertension) of maternal characteristics results in an AUC of 0.816 (95%CI: 0.776 – 0.856), has an excellent accuracy according to diagnostic accuracy classification[38].

A study conducted in China showed that a model developed using advanced maternal age, lower maternal height, history of preterm delivery, amount of vaginal bleeding during pregnancy, and lack of folic acid intake before pregnancy for the prediction of overall preterm birth with AUC of (0.6)[39].

1  
2  
3 316 This difference may be due to some of the predictors they used such as lower maternal height,  
4  
5 317 lack of folic acid intake before pregnancy, and advanced maternal age. However predictors they  
6  
7 318 used such as lack of folic acid intake before pregnancy not easily obtainable information in  
8  
9 319 routine clinical practice, which makes their model less practical in our setting. This prediction  
10  
11 320 model constitutes variables that are easily obtainable and have reasonable accuracy to be used by  
12  
13 321 both mid-and lower-level health professionals in the primary care settings. Among the maternal  
14  
15 322 characteristics included in our model, five can be easily found from history taking and one by  
16  
17 323 test for hemoglobin.

17 324 The model's accuracy is consistent with a retrospective study done in China that established a  
18  
19 325 preterm birth prediction model based on maternal characteristics, including demographics and  
20  
21 326 clinical characteristics, and a model with predictors (gravidity, educational status, residency,  
22  
23 327 previous history of preterm birth, twin pregnancy, pre-gestational diabetes mellitus (type I or II),  
24  
25 328 chronic hypertension, and place of birth) with AUC of 0.749 (95%CI: 0.732–0.767) [40].

25 329 On the other hand, a model incorporating four predictors (cervical length at admission,  
26  
27 330 gestational age, amniotic fluid glucose, and IL-6) has an area under the curve (AUROC) of  
28  
29 331 0.86[41] and similarly, the combination of biophysical, biochemical, immunological,  
30  
31 332 microbiological, fetal cell, exosomal, or cell-free RNA at different gestational ages, integrated as  
32  
33 333 part of a multivariable predictor model may be necessary to advance our attempts to predict  
34  
35 334 sPTL and preterm birth. In the prediction of spontaneous preterm birth within 48 hours, a  
36  
37 335 prognostic model including qfFN and clinical risk factors showed excellent results[42, 43]. Both  
38  
39 336 models have higher discriminatory performance. The reason for the lower discriminatory  
40  
41 337 performance in our study as compared to the studies described above could be because we used  
42  
43 338 secondary data available from the register and as this dataset is limited and some variables that  
44  
45 339 require advanced laboratory tests were not included in the model.

44 340 Hence, predictors necessitate laboratory testing, which is often unavailable in low-resource  
45  
46 341 settings. As a result, such predictors are difficult to come by in ordinary clinical and public  
47  
48 342 health practice, making the model less useful.

49 343 A study conducted in the UK found that data on maternal characteristics and obstetric history at  
50  
51 344 11–13 weeks of gestation were predictive of spontaneous early preterm deliveries; this model  
52  
53 345 had an AUC of 0.67[44] which had lower discriminatory performance than the present study.

54 346 This difference may be difference in study population.

1  
2  
3 347 A model that predict a risk of preterm delivery in women with a multiple pregnancy  
4 348 incorporates previous preterm delivery, monochorionicity, smoking, educational level, and triplet  
5 349 pregnancy for preterm and very preterm delivery had a c-index of 0.68 (95% CI 0.63 to 0.72) and  
6 350 0.68 (95% CI 0.62 to 0.75) respectively[45]. It had lower discriminatory performance than the  
7 351 present study. This might be due to study population difference. In the present study the study  
8 352 populations were both women who had multiple pregnancies and singleton pregnancy.

9  
10  
11  
12  
13 353 In our prediction score, using 3 as a cutoff point has an acceptable level of specificity,  
14 354 sensitivity, PPV, and NPV to predict preterm birth. It is also possible to shift the cutoff point to  
15 355 increase either of the accuracy measures depending on the program aim and availability of  
16 356 resources.

### 20 357 **Conclusion and recommendation**

21  
22 358 This study shows the possibility of predicting preterm birth using a simple prediction model  
23 359 constructed from maternal characteristics. Thus, the optimal combination of maternal  
24 360 characteristics such as residence, gravidity, haemoglobin < 11 mg/dl, premature rupture of  
25 361 membrane, antepartum haemorrhage, and pregnancy-induced hypertension shows the possibility  
26 362 of predicting preterm birth using a simple prediction model constructed from maternal  
27 363 characteristics. In addition, risk score calculations based on a combination of predictors were  
28 364 effective and had comparable accuracy with the model-based approach of original  $\beta$  coefficients.  
29 365 This score may assist in clinical decision-making. In addition, incorporating this convenient and  
30 366 easily applicable score in the health care system to be used by clinicians to inform pregnant  
31 367 mothers about the future course of their outcome after external validation. Doing further research  
32 368 is needed to validate the prediction tool using prospective follow-up studies in another context  
33 369 before introducing it to the clinical and public health practices.

### 43 370 **Data Sharing Statement**

44 371 The data will be available upon request from the corresponding author.

45 372 **Author Contributions:** S.F.F. conceived the study and wrote the manuscript. Z.A.A, S.F.F,  
46 373 G.T.W, A.K.Y, and A.M.D, all contribute to data analysis, study design, and supervision of data  
47 374 collection. All authors participated in manuscript revision for intellectual content and approval of  
48 375 the final version. All authors have read and agreed to the published version of the manuscript.

49 376 **Funding statement:** This work was supported by Bahir Dar University grant number  
50 377 (2500ETB).



378 **Competing interest's statement:** The author reports no conflicts of interest in this work.

### 379 **Ethical approval**

380 Ethical clearance was obtained from the Institutional Review Boards (IRB) of Bahir Dar  
 381 University, College of Medicine and Health Sciences with Protocol number 083/ 2021) on  
 382 February 26, 2021. Confidentiality was maintained by omitting the personal identifier of the  
 383 participant during the data collection procedure and information was used only for research  
 384 purposes. Data were collected from the register, which was kept in a secure place and all data  
 385 were fully anonymized before we access them. After the collection of data, all the patient records  
 386 and patient cards were placed back in a secure place. Data were entered into a password-  
 387 protected computer.

### 388 **References**

- 389 1. Sterne JA, White IR, Carlin JB, Spratt M, Royston P, Kenward MG, et al. Multiple imputation for  
 390 missing data in epidemiological and clinical research: potential and pitfalls. *BMJ*. 2009;  
 391 b2393:338. <https://doi.org/10.1136/bmj.b2393> PMID: 19564179
- 392 2. Organization WH: **Preterm birth and low birth weight**. 2020.
- 393 3. Goldenberg RL, Culhane JF, Iams JD, Romero R. Epidemiology and causes of preterm birth.  
 394 *Lancet* 2008;371(9606):75e84
- 395 4. Althabe F: **Born too soon: the global action report on preterm birth**: World Health  
 396 Organization; 2012.
- 397 5. Liu L, Oza S, Hogan D, Chu Y, Perin J, Zhu J, et al. Global, regional, and national causes of  
 398 under-5 mortality in 2000-15: an updated systematic analysis with implications for the  
 399 Sustainable Development Goals. *Lancet*. 2016;388(10063):3027-35.
- 400 6. World Health Organization. WHO fact sheet on preterm birth. Available from:  
 401 <http://www.who.int/mediacentre/factsheets/fs363/en/>
- 402 7. Organization WH: **WHO fact sheet: Preterm birth**. *World Health Organization, Geneva,*  
 403 *Switzerland* <http://www.who.int/mediacentre/factsheets/fs363/en/> Accessed 2018, 26.
- 404 8. Li S, Xi B: **Preterm birth is associated with risk of essential hypertension in later life**.  
 405 *International journal of cardiology* 2014, 172(2):e361-e363.
- 406 9. Blencowe H, Cousens S, Chou D, Oestergaard M, Say L, Moller A-B, Kinney M, Lawn J: **Born**  
 407 **too soon: the global epidemiology of 15 million preterm births**. *Reproductive health* 2013,  
 408 10(S1):S2.
- 409 10. **Soon BT: The global action report on preterm birth**. *Geneva: World Health Organization*  
 410 *2012*.
- 411 11. Griffin JB, Jobe AH, Rouse D, McClure EM, Goldenberg RL, Kamath-Rayne BD: **Evaluating**  
 412 **WHO-recommended interventions for preterm birth: a mathematical model of the potential**  
 413 **reduction of preterm mortality in Sub-Saharan Africa**. *Global Health: Science and Practice*  
 414 *2019, 7(2):215-227*.
- 415 12. Victora CG, Rubens CE, Group GR: **Global report on preterm birth and stillbirth (4 of 7):**  
 416 **delivery of interventions**. *BMC Pregnancy and Childbirth* 2010, 10(S1):S4.
- 417 13. Kemp M, Newnham J, Challis J, Jobe A, Stock S: **The clinical use of corticosteroids in**  
 418 **pregnancy**. *Human reproduction update* 2016, 22(2):240-259.
- 419 14. Lorthe E, Goffinet F, Marret S, Vayssiere C, Flamant C, Quere M, Benhammou V, Ancel P-Y,  
 420 Kayem G: **Tocolysis after preterm premature rupture of membranes and neonatal outcome:**

- 1  
2  
3 421 **a propensity-score analysis.** *American Journal of Obstetrics and Gynecology* 2017, 217(2):212-  
4 422 e211-212. e212.
- 5 423 15. Oskovi Kaplan ZA, Ozgu-Erdinc AS: **Prediction of Preterm Birth: Maternal Characteristics,**  
6 424 **Ultrasound Markers, and Biomarkers: An Updated Overview.** 2018, 2018:8367571.
- 7 425 16. Lucaroni F, Morciano L, Rizzo G: **Biomarkers for predicting spontaneous preterm birth: an**  
8 426 **umbrella systematic review.** 2018, 31(6):726-734.
- 9 427 17. Lee KA, Chang MH, Park M-H, Park H, Ha EH, Park EA, Kim YJ: **A model for prediction of**  
10 428 **spontaneous preterm birth in asymptomatic women.** *Journal of Women's Health* 2011,  
11 429 20(12):1825-1831.
- 12 430 18. Georgiou HM, Di Quinzio MK, Permezel M, Brennecke SP: **Predicting preterm labour:**  
13 431 **current status and future prospects.** *Disease markers* 2015, 2015.
- 14 432 19. Shennan AH: **Prediction and prevention of preterm birth: a quagmire of evidence.**  
15 433 *Ultrasound Obstet Gynecol* 2018, 51(5):569-570.
- 16 434 20. Son M, Miller ES: **Predicting preterm birth: Cervical length and fetal fibronectin.** *Semin*  
17 435 *Perinatol* 2017, 41(8):445-451.
- 18 436 21. York TP, Strauss III JF, Neale MC, Eaves LJ: **Racial differences in genetic and environmental**  
19 437 **risk to preterm birth.** *PloS one* 2010, 5(8):e12391.
- 20 438 22. Culhane JF, Goldenberg RL: **Racial disparities in preterm birth.** In: *Seminars in perinatology:*  
21 439 *2011*: Elsevier; 2011: 234-239.
- 22 440 23. Raglan GB, Lannon SM, Jones KM, Schulkin J: **Racial and ethnic disparities in preterm birth**  
23 441 **among American Indian and Alaska Native women.** *Maternal and child health journal* 2016,  
24 442 20(1):16-24.
- 25 443 24. Koullali B, Oudijk M, Nijman T, Mol B, Pajkrt E: **Risk assessment and management to**  
26 444 **prevent preterm birth.** In: *Seminars in Fetal and Neonatal Medicine: 2016*: Elsevier; 2016: 80-  
27 445 88.
- 28 446 25. Peduzzi P, Concato J, Kemper E, Holford TR, Feinstein AR: **A simulation study of the number**  
29 447 **of events per variable in logistic regression analysis.** *J Clin Epidemiol* 1996, 49(12):1373-  
30 448 1379.
- 31 449 26. Mekonen DG, Yismaw AE, Nigussie TS, Ambaw WM: **Proportion of Preterm birth and**  
32 450 **associated factors among mothers who gave birth in Debretabor town health institutions,**  
33 451 **northwest, Ethiopia.** *BMC Research Notes* 2019, 12(1):2.
- 34 452 27. Tigist B, Abdela A, Zenebe G: **Preterm birth and associated factors among mothers who gave**  
35 453 **birth in Debre Markos Town Health Institutions.** *Institutional Based Cross sectional study*  
36 454 *2013*.
- 37 455 28. Rosenberg RE, Ahmed ANU, Ahmed S, Saha SK, Chowdhury MA, Black RE, Santosham M,  
38 456 Darmstadt GL: **Determining gestational age in a low-resource setting: validity of last**  
39 457 **menstrual period.** *Journal of health, population, and nutrition* 2009, 27(3):332.
- 40 458 29. Wassie M, Manaye Y, Abeje G, Tifrie M, Worku G: **Determinants of Preterm Birth among**  
41 459 **Newborns Delivered in Bahir Dar City Public Hospitals, North West Ethiopia.** 2020.
- 42 460 30. Woday A, Muluneh MD, Sherif S: **Determinants of preterm birth among mothers who gave**  
43 461 **birth at public hospitals in the Amhara region, Ethiopia: A case-control study.** *PloS one*  
44 462 *2019*, 14(11):e0225060.
- 45 463 31. Wudie F, Tesfamicheal F, Fisseha H, Weldehawaria N, Misgena K, Alema H, Gebregziabher Y,  
46 464 Fisseha G, Woldu M: **Determinants of preterm delivery in the central zone of Tigray,**  
47 465 **northern Ethiopia: A case-control study.** *South African Journal of Child Health* 2019,  
48 466 13(3):108-114.
- 49 467 32. Woldeyohannes D, Kene C, Gomora D, Seyoum K, Assefa T: **Factors Associated with Preterm**  
50 468 **Birth among Mothers Who gave Birth in Dodola Town Hospitals, Southeast Ethiopia:**  
51 469 **Institutional Based Cross Sectional Study.** *Clinics Mother Child Health* 2019, 16(317):2.

- 1  
2  
3 470 33. Muchie KF, Lakew AM, Teshome DF, Yenit MK, Sisay MM, Mekonnen FA, Habitu YA: **Epidemiology of preterm birth in Ethiopia: systematic review and meta-analysis.** *BMC*  
4 471 *pregnancy and childbirth* 2020, 20(1):1-12.  
5 472  
6 473 34. Kwak SK, Kim JH: **Statistical data preparation: management of missing values and outliers.** *Korean journal of anesthesiology* 2017, 70(4):407.  
7 474  
8 475 35. Grobbee DE, Hoes AW. *Clinical epidemiology: principles, methods, and applications for clinical*  
9 476 *research*: Jones & Bartlett Publishers; 2014.  
10 477 36. Moons KGM, Kengne AP, Woodward M, et al. Risk prediction models: I. Development, internal  
11 478 validation, and assessing the incremental value of a new (bio)marker. *Heart* 2012;98:683-90.  
12 479 [Crossref] [PubMed]  
13 480 37. Vickers AJ, Elkin EB: **Decision curve analysis: a novel method for evaluating prediction**  
14 481 **models.** *Med Decis Making* 2006, 26(6):565-574.  
15 482 38. Mandrekar JN: **Receiver Operating Characteristic Curve in Diagnostic Test Assessment.**  
16 483 *Journal of Thoracic Oncology* 2010, 5(9):1315-1316.  
17 484 39. He J-R, Ramakrishnan R, Lai Y-M, Li W-D, Zhao X, Hu Y, Chen N-N, Hu F, Lu J-H, Wei X-L: **Predictions of preterm birth from early pregnancy characteristics: born in guangzhou**  
18 485 **cohort study.** *Journal of clinical medicine* 2018, 7(8):185.  
19 486  
20 487 40. Chen M, Xie N, Liang Z, Qian T, Chen D: **Early Prediction Model for Preterm Birth**  
21 488 **Combining Demographic Characteristics and Clinical Characteristics.** 2020.  
22 489 41. Cobo T, Aldecoa V, Figueras F, Herranz A, Ferrero S, Izquierdo M, Murillo C, Amoedo R,  
23 490 Rueda C, Bosch J: **Development and validation of a multivariable prediction model of**  
24 491 **spontaneous preterm delivery and microbial invasion of the amniotic cavity in women with**  
25 492 **preterm labor.** *American Journal of Obstetrics and Gynecology* 2020.  
26 493 42. Lamont R, Richardson L, Boniface J, Cobo T, Exner M, Christensen I, Forslund S, Gaba A,  
27 494 Helmer H, Jørgensen J: **Commentary on a combined approach to the problem of developing**  
28 495 **biomarkers for the prediction of spontaneous preterm labor that leads to preterm birth.**  
29 496 *Placenta* 2020.  
30 497 43. Stock SJ, Horne M, Bruijn M, Morris R, Dorling J, Jackson L, Chandiramani M, David AL,  
31 498 Khalil A, Shennan A: **793: A new prediction model for birth within 48 hours in women with**  
32 499 **preterm labour symptoms.** *American Journal of Obstetrics & Gynecology* 2020, 222(1):S502.  
33 500 44. Beta, J.; Akolekar, R.; Ventura, W.; Syngelaki, A.; Nicolaides, K.H. Prediction of spontaneous  
34 501 preterm delivery from maternal factors, obstetric history and placental perfusion and function at  
35 502 11–13 weeks. *Prenat. Diagn.* 2011, 31, 75–83  
36 503 45. van de Mheen L, Schuit E, Lim AC, Porath MM, Papatsonis D, Erwich JJ, van Eyck J, Van  
37 504 Oirschot CM, Hummel P, Duvekot JJ: **Prediction of preterm birth in multiple pregnancies:**  
38 505 **development of a multivariable model including cervical length measurement at 16 to 21**  
39 506 **weeks' gestation.** *Journal of obstetrics and gynaecology Canada* 2014, 36(4):309-319.  
40 507  
41 508  
42 509  
43 510  
44 511  
45 512  
46 513  
47 514  
48 515

1  
2  
3 516  
4  
5 517  
6  
7 518  
8  
9 519  
10  
11 520  
12  
13 521  
14  
15  
16 522  
17  
18  
19  
20  
21  
22  
23  
24  
25  
26  
27  
28  
29  
30  
31  
32  
33  
34  
35  
36  
37  
38  
39  
40  
41  
42  
43  
44  
45  
46  
47  
48  
49  
50  
51  
52  
53  
54  
55  
56  
57  
58  
59  
60

For peer review only

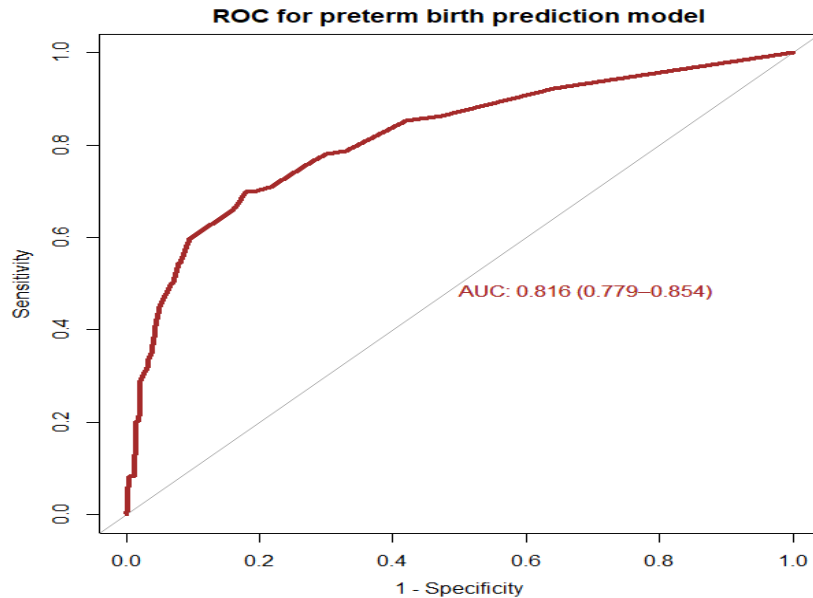

a)

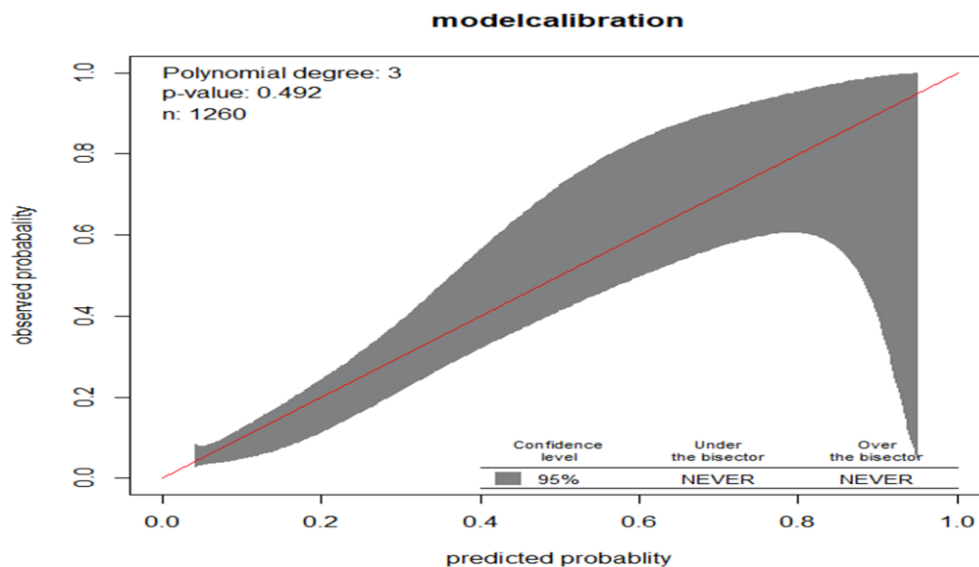

b)

47  
48  
49  
50  
51  
52  
53  
54  
55  
56  
57  
58  
59  
60

Figure 1: (a) Area under the ROC curve for the prediction model, and (b) Predicted versus observed preterm birth probability in the sample. This analysis includes mothers who gave birth at FHCSH, 2021(n = 1260). Calibration plot created using “givitiCalibrationBelt” in R programming.

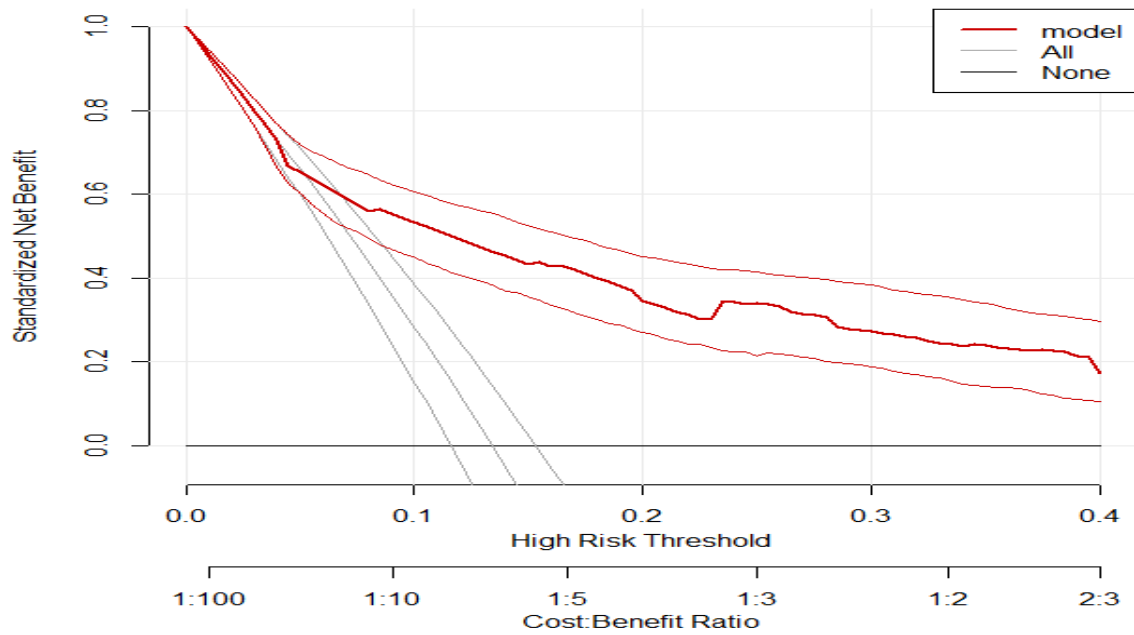

Figure 2: A decision curve plotting the net benefit of the model against threshold probability.

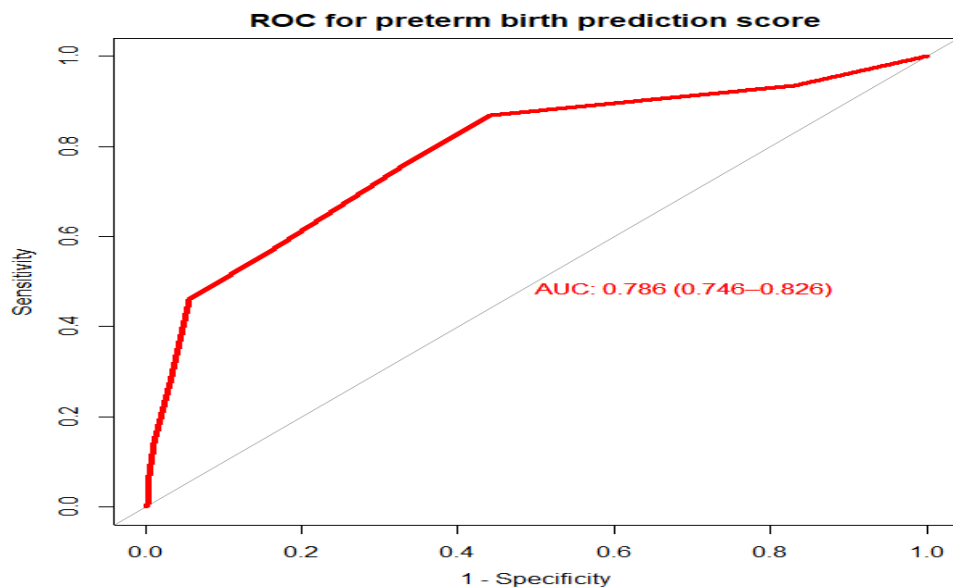

Figure 3: Area under the ROC curve for the simplified risk score to predict the risk of preterm birth among mothers who gave birth at FHCSH, 2021.

**The RECORD statement – checklist of items, extended from the STROBE statement that should be reported in observational studies using routinely collected health data.**

|                           | Item No. | STROBE items                                                                                                                                                                               | Location in manuscript where items are reported | RECORD items                                                                                                                                                                                                                                                                                                                                                                                                                                | Location in manuscript where items are reported |
|---------------------------|----------|--------------------------------------------------------------------------------------------------------------------------------------------------------------------------------------------|-------------------------------------------------|---------------------------------------------------------------------------------------------------------------------------------------------------------------------------------------------------------------------------------------------------------------------------------------------------------------------------------------------------------------------------------------------------------------------------------------------|-------------------------------------------------|
| <b>Title and abstract</b> |          |                                                                                                                                                                                            |                                                 |                                                                                                                                                                                                                                                                                                                                                                                                                                             |                                                 |
|                           | 1        | (a) Indicate the study's design with a commonly used term in the title or the abstract (b) Provide in the abstract an informative and balanced summary of what was done and what was found | Line 1-59                                       | RECORD 1.1: The type of data used should be specified in the title or abstract. When possible, the name of the databases used should be included.<br><br>RECORD 1.2: If applicable, the geographic region and timeframe within which the study took place should be reported in the title or abstract.<br><br>RECORD 1.3: If linkage between databases was conducted for the study, this should be clearly stated in the title or abstract. | Line 1-59                                       |
| <b>Introduction</b>       |          |                                                                                                                                                                                            |                                                 |                                                                                                                                                                                                                                                                                                                                                                                                                                             |                                                 |
| Background rationale      | 2        | Explain the scientific background and rationale for the investigation being reported                                                                                                       | Line 60-100                                     |                                                                                                                                                                                                                                                                                                                                                                                                                                             |                                                 |
| Objectives                | 3        | State specific objectives, including any prespecified hypotheses                                                                                                                           | Line 96-98                                      |                                                                                                                                                                                                                                                                                                                                                                                                                                             |                                                 |
| <b>Methods</b>            |          |                                                                                                                                                                                            |                                                 |                                                                                                                                                                                                                                                                                                                                                                                                                                             |                                                 |
| Study Design              | 4        | Present key elements of study design early in the paper                                                                                                                                    | Line 103                                        |                                                                                                                                                                                                                                                                                                                                                                                                                                             |                                                 |
| Setting                   | 5        | Describe the setting, locations, and relevant dates, including periods of recruitment, exposure, follow-up, and data collection                                                            | Line 103-113<br>Line 123-128                    |                                                                                                                                                                                                                                                                                                                                                                                                                                             |                                                 |
| Participants              | 6        | (a) <i>Cohort study</i> - Give the eligibility criteria, and the                                                                                                                           | Line 123-128                                    | RECORD 6.1: The methods of study population selection (such as codes or                                                                                                                                                                                                                                                                                                                                                                     | Line 129-135                                    |



|                                                                                                                                           |                              |                                                                                                                                                                                                                                                                                                                                                                                                                                                                                                                                                                                                                                                             |                                                                                                                                                                                      |                                                                                                                                                                                                                                                                                                                                                                                                                                                                                                                                                                                                                              |                                                                                                                                                                                                                 |              |
|-------------------------------------------------------------------------------------------------------------------------------------------|------------------------------|-------------------------------------------------------------------------------------------------------------------------------------------------------------------------------------------------------------------------------------------------------------------------------------------------------------------------------------------------------------------------------------------------------------------------------------------------------------------------------------------------------------------------------------------------------------------------------------------------------------------------------------------------------------|--------------------------------------------------------------------------------------------------------------------------------------------------------------------------------------|------------------------------------------------------------------------------------------------------------------------------------------------------------------------------------------------------------------------------------------------------------------------------------------------------------------------------------------------------------------------------------------------------------------------------------------------------------------------------------------------------------------------------------------------------------------------------------------------------------------------------|-----------------------------------------------------------------------------------------------------------------------------------------------------------------------------------------------------------------|--------------|
| 1<br>2<br>3<br>4<br>5<br>6<br>7<br>8<br>9<br>10<br>11<br>12<br>13<br>14<br>15<br>16<br>17<br>18<br>19<br>20<br>21<br>22<br>23<br>24<br>25 |                              | <p>sources and methods of selection of participants. Describe methods of follow-up</p> <p><i>Case-control study</i> - Give the eligibility criteria, and the sources and methods of case ascertainment and control selection. Give the rationale for the choice of cases and controls</p> <p><i>Cross-sectional study</i> - Give the eligibility criteria, and the sources and methods of selection of participants</p> <p><i>(b) Cohort study</i> - For matched studies, give matching criteria and number of exposed and unexposed</p> <p><i>Case-control study</i> - For matched studies, give matching criteria and the number of controls per case</p> |                                                                                                                                                                                      | <p>algorithms used to identify subjects) should be listed in detail. If this is not possible, an explanation should be provided.</p> <p>RECORD 6.2: Any validation studies of the codes or algorithms used to select the population should be referenced. If validation was conducted for this study and not published elsewhere, detailed methods and results should be provided.</p> <p>RECORD 6.3: If the study involved linkage of databases, consider use of a flow diagram or other graphical display to demonstrate the data linkage process, including the number of individuals with linked data at each stage.</p> |                                                                                                                                                                                                                 |              |
| 26<br>27<br>28<br>29<br>30<br>31<br>32                                                                                                    | Variables                    | 7                                                                                                                                                                                                                                                                                                                                                                                                                                                                                                                                                                                                                                                           | Clearly define all outcomes, exposures, predictors, potential confounders, and effect modifiers. Give diagnostic criteria, if applicable.                                            | Line 137-147                                                                                                                                                                                                                                                                                                                                                                                                                                                                                                                                                                                                                 | RECORD 7.1: A complete list of codes and algorithms used to classify exposures, outcomes, confounders, and effect modifiers should be provided. If these cannot be reported, an explanation should be provided. | Line 137-147 |
| 33<br>34<br>35<br>36<br>37<br>38<br>39<br>40                                                                                              | Data sources/<br>measurement | 8                                                                                                                                                                                                                                                                                                                                                                                                                                                                                                                                                                                                                                                           | For each variable of interest, give sources of data and details of methods of assessment (measurement). Describe comparability of assessment methods if there is more than one group | Line 142-147                                                                                                                                                                                                                                                                                                                                                                                                                                                                                                                                                                                                                 |                                                                                                                                                                                                                 |              |
| 41<br>42                                                                                                                                  | Bias                         | 9                                                                                                                                                                                                                                                                                                                                                                                                                                                                                                                                                                                                                                                           | Describe any efforts to address potential sources of bias                                                                                                                            | Line 123-141                                                                                                                                                                                                                                                                                                                                                                                                                                                                                                                                                                                                                 |                                                                                                                                                                                                                 |              |
| 43<br>44                                                                                                                                  | Study size                   | 10                                                                                                                                                                                                                                                                                                                                                                                                                                                                                                                                                                                                                                                          | Explain how the study size was                                                                                                                                                       | Line 114-122                                                                                                                                                                                                                                                                                                                                                                                                                                                                                                                                                                                                                 |                                                                                                                                                                                                                 |              |

45  
46  
47

|                                                                                                                                           |                                  |            |                                                                                                                                                                                                                                                                                                                                                                                                                                                                                                                                                                      |              |                                                                                                                                                                                                                                                              |
|-------------------------------------------------------------------------------------------------------------------------------------------|----------------------------------|------------|----------------------------------------------------------------------------------------------------------------------------------------------------------------------------------------------------------------------------------------------------------------------------------------------------------------------------------------------------------------------------------------------------------------------------------------------------------------------------------------------------------------------------------------------------------------------|--------------|--------------------------------------------------------------------------------------------------------------------------------------------------------------------------------------------------------------------------------------------------------------|
|                                                                                                                                           |                                  | arrived at |                                                                                                                                                                                                                                                                                                                                                                                                                                                                                                                                                                      |              |                                                                                                                                                                                                                                                              |
| 1<br>2<br>3<br>4<br>5<br>6                                                                                                                | Quantitative variables           | 11         | Explain how quantitative variables were handled in the analyses. If applicable, describe which groupings were chosen, and why                                                                                                                                                                                                                                                                                                                                                                                                                                        | Line 155-198 |                                                                                                                                                                                                                                                              |
| 7<br>8<br>9<br>10<br>11<br>12<br>13<br>14<br>15<br>16<br>17<br>18<br>19<br>20<br>21<br>22<br>23<br>24<br>25<br>26<br>27<br>28<br>29<br>30 | Statistical methods              | 12         | (a) Describe all statistical methods, including those used to control for confounding<br>(b) Describe any methods used to examine subgroups and interactions<br>(c) Explain how missing data were addressed<br>(d) <i>Cohort study</i> - If applicable, explain how loss to follow-up was addressed<br><i>Case-control study</i> - If applicable, explain how matching of cases and controls was addressed<br><i>Cross-sectional study</i> - If applicable, describe analytical methods taking account of sampling strategy<br>(e) Describe any sensitivity analyses | Line 155-198 |                                                                                                                                                                                                                                                              |
| 31<br>32<br>33<br>34<br>35<br>36<br>37<br>38<br>39<br>40<br>41                                                                            | Data access and cleaning methods |            | Line 148-154                                                                                                                                                                                                                                                                                                                                                                                                                                                                                                                                                         |              | RECORD 12.1: Authors should describe the extent to which the investigators had access to the database population used to create the study population.<br><br>RECORD 12.2: Authors should provide information on the data cleaning methods used in the study. |
| 42<br>43<br>44                                                                                                                            | Linkage                          |            | ..                                                                                                                                                                                                                                                                                                                                                                                                                                                                                                                                                                   |              | RECORD 12.3: State whether the study included person-level, institutional-                                                                                                                                                                                   |
|                                                                                                                                           |                                  |            |                                                                                                                                                                                                                                                                                                                                                                                                                                                                                                                                                                      |              | Line 130-132                                                                                                                                                                                                                                                 |

|                  |    |                                                                                                                                                                                                                                                                                                                                                 |              |                                                                                                                                                                                                                                                                                                                    |              |
|------------------|----|-------------------------------------------------------------------------------------------------------------------------------------------------------------------------------------------------------------------------------------------------------------------------------------------------------------------------------------------------|--------------|--------------------------------------------------------------------------------------------------------------------------------------------------------------------------------------------------------------------------------------------------------------------------------------------------------------------|--------------|
|                  |    |                                                                                                                                                                                                                                                                                                                                                 |              | level, or other data linkage across two or more databases. The methods of linkage and methods of linkage quality evaluation should be provided.                                                                                                                                                                    |              |
| <b>Results</b>   |    |                                                                                                                                                                                                                                                                                                                                                 |              |                                                                                                                                                                                                                                                                                                                    |              |
| Participants     | 13 | (a) Report the numbers of individuals at each stage of the study ( <i>e.g.</i> , numbers potentially eligible, examined for eligibility, confirmed eligible, included in the study, completing follow-up, and analysed)<br>(b) Give reasons for non-participation at each stage.<br>(c) Consider use of a flow diagram                          | Line 130-135 | RECORD 13.1: Describe in detail the selection of the persons included in the study ( <i>i.e.</i> , study population selection) including filtering based on data quality, data availability and linkage. The selection of included persons can be described in the text and/or by means of the study flow diagram. | Line 130-135 |
| Descriptive data | 14 | (a) Give characteristics of study participants ( <i>e.g.</i> , demographic, clinical, social) and information on exposures and potential confounders<br>(b) Indicate the number of participants with missing data for each variable of interest<br>(c) <i>Cohort study</i> - summarise follow-up time ( <i>e.g.</i> , average and total amount) | Line 232-241 |                                                                                                                                                                                                                                                                                                                    |              |
| Outcome data     | 15 | <i>Cohort study</i> - Report numbers of outcome events or summary measures over time<br><i>Case-control study</i> - Report numbers in each exposure category, or summary measures of exposure<br><i>Cross-sectional study</i> - Report numbers of outcome events or summary measures                                                            | Line 247     |                                                                                                                                                                                                                                                                                                                    |              |
| Main results     | 16 | (a) Give unadjusted estimates                                                                                                                                                                                                                                                                                                                   | Line 246-286 |                                                                                                                                                                                                                                                                                                                    |              |

|                   |    |                                                                                                                                                                                                                                                                                                                                                                                   |              |                                                                                                                                                                                                                                                                                                          |       |
|-------------------|----|-----------------------------------------------------------------------------------------------------------------------------------------------------------------------------------------------------------------------------------------------------------------------------------------------------------------------------------------------------------------------------------|--------------|----------------------------------------------------------------------------------------------------------------------------------------------------------------------------------------------------------------------------------------------------------------------------------------------------------|-------|
|                   |    | and, if applicable, confounder-adjusted estimates and their precision (e.g., 95% confidence interval). Make clear which confounders were adjusted for and why they were included<br>(b) Report category boundaries when continuous variables were categorized<br>(c) If relevant, consider translating estimates of relative risk into absolute risk for a meaningful time period |              |                                                                                                                                                                                                                                                                                                          |       |
| Other analyses    | 17 | Report other analyses done—e.g., analyses of subgroups and interactions, and sensitivity analyses                                                                                                                                                                                                                                                                                 | Line 162-166 |                                                                                                                                                                                                                                                                                                          |       |
| <b>Discussion</b> |    |                                                                                                                                                                                                                                                                                                                                                                                   |              |                                                                                                                                                                                                                                                                                                          |       |
| Key results       | 18 | Summarise key results with reference to study objectives                                                                                                                                                                                                                                                                                                                          | Line 351-362 |                                                                                                                                                                                                                                                                                                          |       |
| Limitations       | 19 | Discuss limitations of the study, taking into account sources of potential bias or imprecision. Discuss both direction and magnitude of any potential bias                                                                                                                                                                                                                        | Line 50-59   | RECORD 19.1: Discuss the implications of using data that were not created or collected to answer the specific research question(s). Include discussion of misclassification bias, unmeasured confounding, missing data, and changing eligibility over time, as they pertain to the study being reported. | ..... |
| Interpretation    | 20 | Give a cautious overall interpretation of results considering objectives, limitations, multiplicity of analyses, results from similar studies, and other relevant evidence                                                                                                                                                                                                        | Line 351-362 |                                                                                                                                                                                                                                                                                                          |       |
| Generalisability  | 21 | Discuss the generalisability (external validity) of the study results                                                                                                                                                                                                                                                                                                             | Line 351-362 |                                                                                                                                                                                                                                                                                                          |       |

| Other Information                                         |    |                                                                                                                                                               |          |                                                                                                                                                          |          |
|-----------------------------------------------------------|----|---------------------------------------------------------------------------------------------------------------------------------------------------------------|----------|----------------------------------------------------------------------------------------------------------------------------------------------------------|----------|
| Funding                                                   | 22 | Give the source of funding and the role of the funders for the present study and, if applicable, for the original study on which the present article is based | Line 369 |                                                                                                                                                          |          |
| Accessibility of protocol, raw data, and programming code |    | Line 364                                                                                                                                                      |          | RECORD 22.1: Authors should provide information on how to access any supplemental information such as the study protocol, raw data, or programming code. | Line 364 |

\*Reference: Benchimol EI, Smeeth L, Guttman A, Harron K, Moher D, Petersen I, Sørensen HT, von Elm E, Langan SM, the RECORD Working Committee. The REporting of studies Conducted using Observational Routinely-collected health Data (RECORD) Statement. *PLoS Medicine* 2015; in press.

\*Checklist is protected under Creative Commons Attribution ([CC BY](https://creativecommons.org/licenses/by/4.0/)) license.

# BMJ Open

## Developing and validating risk prediction model for preterm birth at Felege Hiwot comprehensive specialized hospital, Northwest Ethiopia: A retrospective follow-up study

|                                 |                                                                                                                                                                                                                                                                                                                                                                                                     |
|---------------------------------|-----------------------------------------------------------------------------------------------------------------------------------------------------------------------------------------------------------------------------------------------------------------------------------------------------------------------------------------------------------------------------------------------------|
| Journal:                        | <i>BMJ Open</i>                                                                                                                                                                                                                                                                                                                                                                                     |
| Manuscript ID                   | bmjopen-2022-061061.R2                                                                                                                                                                                                                                                                                                                                                                              |
| Article Type:                   | Original research                                                                                                                                                                                                                                                                                                                                                                                   |
| Date Submitted by the Author:   | 29-Aug-2022                                                                                                                                                                                                                                                                                                                                                                                         |
| Complete List of Authors:       | Feleke, Sefineh; Woldia University, Public health Anteneh, Zelalem; Bahir Dar University College of Medical and Health Sciences, Epidemiology<br>Wassie, Gizachew; Bahir Dar University College of Medical and Health Sciences, Epidemiology and Biostatistics<br>Yalew, Anteneh ; Wolkite University, Department of Public Health<br>Mengist, Anteneh; Debre Tabor University, Reproductive Health |
| <b>Primary Subject Heading</b>: | Research methods                                                                                                                                                                                                                                                                                                                                                                                    |
| Secondary Subject Heading:      | Obstetrics and gynaecology, Public health, Evidence based practice, Paediatrics, Diagnostics                                                                                                                                                                                                                                                                                                        |
| Keywords:                       | OBSTETRICS, PUBLIC HEALTH, PERINATOLOGY                                                                                                                                                                                                                                                                                                                                                             |
|                                 |                                                                                                                                                                                                                                                                                                                                                                                                     |

SCHOLARONE™  
Manuscripts



I, the Submitting Author has the right to grant and does grant on behalf of all authors of the Work (as defined in the below author licence), an exclusive licence and/or a non-exclusive licence for contributions from authors who are: i) UK Crown employees; ii) where BMJ has agreed a CC-BY licence shall apply, and/or iii) in accordance with the terms applicable for US Federal Government officers or employees acting as part of their official duties; on a worldwide, perpetual, irrevocable, royalty-free basis to BMJ Publishing Group Ltd ("BMJ") its licensees and where the relevant Journal is co-owned by BMJ to the co-owners of the Journal, to publish the Work in this journal and any other BMJ products and to exploit all rights, as set out in our [licence](#).

The Submitting Author accepts and understands that any supply made under these terms is made by BMJ to the Submitting Author unless you are acting as an employee on behalf of your employer or a postgraduate student of an affiliated institution which is paying any applicable article publishing charge ("APC") for Open Access articles. Where the Submitting Author wishes to make the Work available on an Open Access basis (and intends to pay the relevant APC), the terms of reuse of such Open Access shall be governed by a Creative Commons licence – details of these licences and which [Creative Commons](#) licence will apply to this Work are set out in our licence referred to above.

Other than as permitted in any relevant BMJ Author's Self Archiving Policies, I confirm this Work has not been accepted for publication elsewhere, is not being considered for publication elsewhere and does not duplicate material already published. I confirm all authors consent to publication of this Work and authorise the granting of this licence.

1  
2  
3  
4 1  
5 2  
6 2 Developing and validating risk prediction model for preterm birth at Felege  
7 3  
8 3 Hiwot Comprehensive Specialized Hospital, Northwest Ethiopia: A  
9 4  
10 4 retrospective follow-up study

11 5 Sefineh Fenta Feleke\*<sup>1</sup>, Zelalem Alamrew Anteneh<sup>2</sup>, Gizachew Tadesse Wassie<sup>2</sup>, Anteneh  
12 6 Kassa Yalew<sup>3</sup>, Anteneh Mengist Dessie<sup>4</sup>

- 13 6  
14 7  
15 7 1. Woldia University, Collage of Health Science, Department of Public Health  
16 8  
17 8 2. Bahir Dar University, College of Medicine and Health Science, School of Public Health,  
18 9 Department of Epidemiology and Biostatistics  
19 9  
20 10 3. Wolkite University, Collage of Health Science, Department of Public Health  
21 11  
22 11 4. Debre Tabor University, Collage of Health Science, Department of Public Health

23 12 \*Correspondence: [Sefineh Fenta](#)

24 13 Email address: [fentasefineh21@gmail.com](mailto:fentasefineh21@gmail.com)

25 14 Phone number: +251928573882

26 15 P.O.Box: 400  
27 16  
28 17  
29 18  
30 19  
31 20  
32 21  
33 22  
34 23  
35 24  
36 25  
37 26  
38 27  
39 28  
40  
41  
42  
43  
44  
45  
46  
47  
48  
49  
50  
51  
52  
53  
54  
55  
56  
57



## 29 Abstract

30 **Objective:** To develop and validate a risk prediction model for the prediction of preterm birth  
31 using maternal characteristics.

32 **Design:** A retrospective follow-up study was conducted. Data were coded and entered into  
33 Epidata, version 3.02, and were analyzed by using R statistical programming language version  
34 4.0.4 for further processing and analysis. Bivariable logistic regression was done to identify the  
35 relationship between each predictor and preterm birth. Variables with ( $p \leq 0.25$ ) from the  
36 bivariable analysis were entered into a backward stepwise multivariable logistic regression  
37 model, and significant variables ( $p < 0.05$ ) were retained in the multivariable model. Model  
38 accuracy and goodness of fit were assessed by computing the area under the ROC curve  
39 (discrimination) and calibration plot (calibration), respectively.

40 **Setting and participants:** This retrospective study was conducted among 1260 pregnant women  
41 who did prenatal care and finally delivered at Felege Hiwot Comprehensive Specialized  
42 Hospital, Bahir Dar city, Northwest Ethiopia, from January 30, 2019, to January 30, 2021.

43 **Results:** Residence, gravidity, haemoglobin  $< 11$  mg/dl, early rupture of membranes, antepartum  
44 haemorrhage, and pregnancy-induced hypertension remained in the final multivariable prediction  
45 model. The AUC of the model was 0.816 (95% confidence interval: 0.779 – 0.856).

46 **Conclusion:** This study showed the possibility of predicting preterm birth using maternal  
47 characteristics during pregnancy. Thus, using this model could help to identify pregnant women  
48 at a higher risk of having a preterm birth to be linked to a center

49 **Keywords:** Prediction Model, Preterm birth, Risk score, Ethiopia

### 50 Strength and Limitations of the study

- 51 ✓ An adequate number of participants with the outcome helped us to construct the  
52 model using a sufficient number of predictor variables and the inclusion of sensitivity  
53 analyses.
- 54 ✓ Multiple imputation were used to address missing data, which has been shown to be a  
55 valid technique for dealing with missing data within logistic regression models, resulting  
56 in less bias than excluding all women with missing data.
- 57 ✓ The prediction model is constructed from easily obtainable maternal characteristics that  
58 make it applicable in primary care settings.

- 1  
2  
3 59 ✓ A single-site study, it is confined to a single area, which needs external validation before  
4 using it in another context.  
5  
6 61 ✓ Furthermore, data were collected from each mother's card; due to this, some important  
7 variables were missed, such as previously highlighted factors of preterm birth in  
8 62 different studies.  
9  
10 63  
11  
12 64

## 65 **Introduction**

66 Preterm birth is described as babies that are born alive before the end of 37 weeks of  
67 pregnancy[1]. Preterm birth can be accidental (due to spontaneous preterm labor and/or preterm  
68 membrane rupture) or induced by the provider (by cesarean or labor induction)[2]. Most preterm  
69 births happen spontaneously[3].

70 An estimated 15 million babies worldwide are born too early per year. That is more than 1 in 10  
71 infants. About 1 million newborns die per year because of preterm birth complications[4].

72 Across 184 countries, the rate of preterm birth ranges from 5% to 18% of babies born [5].  
73 However, there are stark disparities in survival rates around the world. Half of the babies born at  
74 or below 32 weeks die in low-income settings due to a lack of practical, cost-effective, and  
75 critical care, such as comfort, breastfeeding assistance, basic infection care, and trouble  
76 Breathing[6].

77 Furthermore, the effect of preterm birth is also prolonged beyond the neonatal phase and  
78 throughout life[7]. Hence, the largest risk of severe health issues, including cerebral palsy,  
79 intellectual disability, chronic lung disease, and vision and hearing loss, is faced by babies born  
80 before maturity. This introduces a lifelong disability dimension. At some point in their lives,  
81 most people will face the struggles and potential disasters of preterm birth either directly in their  
82 families or indirectly through events for the nations[7, 8].

83 To alleviate this burden, in the past few decades, numerous methods have been attempted  
84 internationally, including in Ethiopia, to prevent and enhance the treatment of preterm births [9-  
85 11]. As part of the strategy, it is essential to diagnose or predict preterm birth earlier in  
86 pregnancy to take appropriate measures for high-risk groups. However, in most nations,  
87 predicting preterm birth is still largely based on subjective clinical experience. This approach  
88 may increase unnecessary hospital admissions and unnecessary but potentially harmful  
89 treatments, such as the use of steroids for the maturation of the fetal lung and tocolysis[12, 13].

1  
2  
3 90 There were clinical prediction models that aim to estimate the likelihood of preterm birth that  
4 91 include laboratory tests that are typically inaccessible in low-resource settings, such as fetal  
5 92 fibronectin, insulin-like growth factor binding protein-1 (IGFBP-1), interleukin-6, and placental  
6 93 alpha-macroglobulin-1[14-19]. Most current research on PTB prediction focuses on finding PTB  
7 94 risk factors using a hypothesis-testing methodology in highly controlled environments. PTB has  
8 95 been linked to a number of risk factors, including previous preterm labor, multiple gestation  
9 96 (carrying several children), and diabetes, problems with the cervix, uterus, or placenta, smoking,  
10 97 and infections [20-22]. However, women who have preterm delivery often have no known risk  
11 98 factors[23]. In addition, some of the predictors (such as prior PTB) do not apply for first-time  
12 99 mothers.

13  
14  
15  
16  
17  
18  
19  
20 100 Predicting the risk of PTB in pregnant women has been the subject of numerous studies[24], but  
21 101 no model exists that is accurate enough to be used in clinical settings. Most research (e.g.,  
22 102 cervical length or fetal fibronectin) have concentrated on predictors during the second or third  
23 103 trimester[25]. These predictors, however, can only forecast PTB at intermediate risk and have  
24 104 only been shown to be reliable in high-risk populations. Unfortunately, the majority of women  
25 105 who give birth early have no evident risk factors, and more than half of PTBs happen in low-risk  
26 106 pregnancies, indicating the limited usefulness of using fetal fibronectin or cervical length in the  
27 107 general population[26].

28  
29  
30  
31  
32  
33  
34 108 Due to scarce resources, using readily available data to predict PTB seems appealing in low- and  
35 109 middle-income communities. But relatively few models have been made public. The  
36 110 considerable range in PTB occurrence across the globe, which suggests differences in exposure  
37 111 to psychosocial, sociodemographic, and medical risk factors as well as genetic variations, is also  
38 112 significant [27-29]. As a result, it is necessary to develop and evaluate PTB prediction models in  
39 113 various populations.

40  
41  
42  
43  
44 114 Therefore, developing and validating a risk prediction model for the prediction of preterm birth  
45 115 using maternal (clinical and nonclinical) characteristics based on the available measurements is  
46 116 paramount to allow early preterm birth interventions such as in utero transfer to tertiary care  
47 117 centers, appropriate corticosteroid administration while preventing excessive use,  
48 118 neuroprotective magnesium sulfate therapy, and antibiotic treatment in the event of infection[14,  
49 119 30]

50  
51  
52  
53  
54  
55 120

## 121 **Methods and Materials**

### 122 **Study setting**

123 This retrospective study was conducted among 1260 pregnant women who did prenatal care and  
124 finally delivered at Felege Hiwot Comprehensive Specialized Hospital, Bahir Dar city,  
125 Northwest Ethiopia, from January 30, 2019, to January 30, 2021. Bahir Dar is the capital city of  
126 Amhara national regional state and is found 575 km northwest of Addis Ababa.  
127 The hospital has currently a total of 1431 manpower (5 Obstetricians and Gynaecologists and 63  
128 midwives among others) in different disciplines. It has a total of 500 formal beds, 11 wards  
129 (emergency ward and Inpatient wards such as Gynecological & Obstetric, Surgical, Orthopaedics,  
130 Medical, Pediatric, L&D, Eye unit, NICU, psychiatric, oncology, and 22 OPDS), 39 clinical and  
131 non-clinical departments /service units / providing laboratory, Diagnostic, curative &  
132 Rehabilitation service at outpatient & inpatient bases as well as disease prevention & health  
133 promotion services.

### 134 **Sample size determination**

135 The sample size required for model development was determined based on the minimum  
136 standard of 10 events per candidate predictor considered, according to the formula  $N = (n \times$   
137  $10)/I$ , where  $N$  is the sample size,  $n$  is the number of candidate predictor variables and  $I$  is the  
138 estimated event rate in the population[31]. Since there were 17 candidate predictors considered  
139 and 10 events per candidate predictor, the estimated number of events for the study was 170.  
140 Based on a study done on the prevalence of preterm birth in Debre Tabor hospital was 13%[32],  
141 so taking into account this the required sample size was calculated as follows,  $n = 170 * 100 / 13 =$   
142 1308.

### 143 **Study Design and Participants**

144 The theoretical design of the present study was; the incidence of preterm birth as a function of  
145 multiple predictors during pregnancy. The source population of the study was all pregnant  
146 mothers who gave birth at FHCSH. To be included in this study, mothers must meet all of the  
147 following eligibility criteria; all medical records of mothers who gave live birth and had at least  
148 one ANC follow-up in FHCSH from January 30/2019 to January 30/2021.

### 149 **Sampling method and procedures**

150 A simple random sampling technique was employed to select participants using the medical  
151 registration number of a delivered mother from the delivery registration book. First, all mothers

1  
2  
3 152 delivered at FHCSH in the last two years was identified from the delivery registration book.  
4  
5 153 After that, records of mothers who met the inclusion criteria were included in the study.  
6  
7 154 Subsequently, a sampling frame was prepared. Finally, the study unit was selected by using a  
8  
9 155 computer-generated random number.

### 10 156 **Data Collection**

11  
12 157 Outcome assessment: The outcome variable was attributed to women whose medical records  
13  
14 158 indicated a physician or midwife diagnosis of preterm birth and delivery between 28 and 36  
15  
16 159 completed weeks of gestation. The gestational age (GA) was measured using either LNMP,  
17  
18 160 which is found to be a more reliable measure of GA in a low-resource setting[33, 34], or an early  
19  
20 161 ultrasound result(12 weeks).

21  
22 162 Predictor assessment: Data were collected using a structured checklist through chart review.  
23  
24 163 Checklists were developed after reviewing various relevant literatures [35-39]. It consists of  
25  
26 164 socio-demographic (Maternal age, Residence), Maternal obstetric characteristics : (History of  
27  
28 165 preterm birth, History of abortion, history of stillbirth, gravidity, Parity, Multiple pregnancy,  
29  
30 166 APH, PROM, Gestational DM, and PIH), Maternal medical condition : (HGB level, Diabetic  
31  
32 167 Mellitus, Chronic Hypertension, UTI and HIV).

### 32 169 **Quality Assurance Mechanisms**

33  
34 170 To maintain the quality of data, the data collectors and supervisors were trained for a day on the  
35  
36 171 objective of the study, the content of the checklists, and how to fill the checklists. Afterward,  
37  
38 172 reviewing 15 charts medical records of mothers who gave birth at Felege Hiwot Comprehensive  
39  
40 173 Specialized Hospital which is found in Northwest Ethiopia were done. After that, some  
41  
42 174 adjustments (removing variables that were not available in the medical records of mothers) were  
43  
44 175 done accordingly. The checklist was developed in English.

### 44 176 **Data Processing and Analysis**

45  
46 177 Data were entered into a software application (EPI DATA, version 3.02) and was analyzed by  
47  
48 178 using R statistical programming language version 4.0.4 for further processing and analysis.  
49  
50 179 There were 13(1%), 2(0.2 %), 11 (0.9 %),15 (2.5%), 21 (1.7%) ,29(2.3%),20(1.6%) and 20  
51  
52 180 (1.6%) missing values for premature rupture of membranes , residence, chronic hypertension,  
53  
54 181 multiple pregnancy gestational diabetes Mellitus, pregnancy-induced hypertension ,antepartum  
55  
56 182 hemorrhage and hemoglobin respectively.

183 We assumed the data were missing at random, and we, therefore, performed a multivariate  
 184 imputation by chained equations for all variables evaluated in the prediction model [40].  
 185 Sensitivity analysis was performed to assess whether the assumption of missing at random  
 186 (MAR) is valid or not, and the results were reasonably comparable table (1). Descriptive  
 187 statistics including median, interquartile range (IQR), and percentages, were carried out.

188 **Table 1. Sensitivity analysis of the model to predict preterm birth: Comparison of the**  
 189 **regression coefficients, standard errors (SE), and p-values for complete case analysis**  
 190 **(CCA) and multiple imputed data (MI).**

| Predictor variables        | Complete case analysis |        |         | Multiple imputations |        |         |
|----------------------------|------------------------|--------|---------|----------------------|--------|---------|
|                            | B                      | SE     | P value | B                    | SE     | P value |
| Chronic hypertension (yes) | 0.7313                 | 0.6297 | 0.24    | 0.581                | 0.6285 | 0.92    |
| Residence (rural)          | 0.815                  | 0.1946 | <0.001  | 1.154                | 0.1958 | <0.001  |
| GDM(yes )                  | 0.709                  | 0.4028 | 0.07    | 0.472                | 0.4236 | 0.26    |
| HGB(<11g/dl)               | 0.497                  | 0.2185 | 0.02    | 0.642                | 0.2153 | 0.001   |
| PROM (yes)                 | 1.898                  | 0.2080 | <0.001  | 2.097                | 0.2129 | <0.001  |
| APH (yes)                  | 1.194                  | 0.2858 | <0.001  | 1.298                | 0.2874 | <0.001  |
| PIH (yes)                  | 1.353                  | 0.2600 | <0.001  | 1.368                | 0.2523 | <0.001  |
| Multiple pregnancy (yes)   | 0.539                  | 0.3173 | 0.08    | 0.446                | 0.3257 | 0.17    |
| Gravidity(primigravida)    | 0.426                  | 0.1944 | 0.02    | 0.711                | 0.1976 | <0.001  |

191

## 192 Model Development and Validation

193 For model development, bivariable logistic regression was done to obtain insight into the  
 194 association between each potential predictor and preterm birth. Variables with ( $p \leq 0.25$ ) from  
 195 the bivariable analysis were entered into a backward stepwise multivariable logistic regression  
 196 model, and significant variables ( $p < 0.05$ ) were retained in the multivariable model. The results  
 197 of significant predictors were reported as coefficients with 95% confidence intervals (CI). To  
 198 check for the model accuracy and goodness of fit, we computed the area under the ROC curve  
 199 (discrimination) and calibration plot (calibration) using “classifierplots” and “givitiR” packages  
 200 of R respectively. The AUC ranged from 0.5 (no predictive ability) to 1 (perfect

1  
2  
3 201 discrimination)[41]. The regression coefficients and their 95% confidence levels, and the AUC  
4  
5 202 were adjusted for overfitting or over optimism using the bootstrapping technique. To make  
6  
7 203 internal validation, we computed 1000 random bootstrap [42]samples with the replacement of all  
8  
9 204 predictors in the data. The model's predictive performance after bootstrapping is considered as  
10  
11 205 the performance that can be expected when the model is applied to future similar populations. To  
12  
13 206 evaluate the clinical and public health impact of the model, we performed a decision curve  
14  
15 207 analysis (DCA) [43] of standardized net benefits across a range of threshold probabilities (0 to  
16  
17 208 1). In the DCA, the model was compared with two extreme scenarios; "intervention for all" and  
18  
19 209 "no intervention". In our case, the intervention considered is the referral of high-risk pregnant  
20  
21 210 women to facilities where appropriate, corticosteroid administration, antibiotic treatment.

### 211 **Risk Score Development**

212 To construct an easily applicable preterm birth prediction score, we transformed each coefficient  
213 of the model into a rounded number by dividing it by the lowest coefficient. The number of  
214 points was subsequently rounded to the nearest integer. We determined the total score for each  
215 individual by assigning points for each variable present and adding them up. The score was  
216 transformed to dichotomous, allowing each pregnant woman to be classified as having a high or  
217 low risk of preterm birth. The receiver operating characteristic curve (ROC) was plotted and the  
218 area under the curve (AUC) was calculated to measure the discriminatory power of the scoring  
219 system.

### 220 **Patient and public involvement**

221 There was no direct interaction with patients in this study and no direct patient involvement in  
222 the design or conduct of this study.

223

224

225

226

227

228

229

230

## 231 Result

### 232 Demographic, Obstetric, and Clinical Characteristics of mothers

233 A total of 1260 study cards were reviewed from a sample of 1308, about 48 cards were not  
 234 reviewed due to the outcome of intrauterine fetal death, and abortion. Table (2) shows the  
 235 demographic, obstetric, and clinical characteristics of mothers who gave birth included in the  
 236 analysis. The median age of the study participants was 26 years with IQR (24-30years); the  
 237 majority of the participants 1086 (86.2%) were in the age group of 20-34 years.  
 238 More than three-fourth of the participants 926 (73.49%) were urban residents. Of the total of  
 239 mothers who delivered at FHCSH, more than two-thirds of 841 (66.7%) were multigravida.  
 240 About parity, above, half of them 713 (56.6%) were multipara. Concerning past obstetric history,  
 241 55 (6.5%) of them had a history of previous preterm birth, 76 (9%) of them had a history of  
 242 stillbirth and 162 (19.3%) of them had a history of abortion.

243 **Table 2. Demographic, obstetric, and clinical characteristics of mothers who gave birth at**  
 244 **FHCSH , Northwest Ethiopia, 2021.**

| Characteristics      | Category     | Frequency | Percent |
|----------------------|--------------|-----------|---------|
| Gravidity            | Primigravida | 419       | 33.3    |
|                      | Multigravida | 841       | 66.7    |
| Residence            | Urban        | 926       | 73.5    |
|                      | Rural        | 334       | 26.5    |
| GDM                  | Yes          | 44        | 3.5     |
|                      | No           | 1216      | 96.5    |
| APH                  | Yes          | 84        | 6.7     |
|                      | No           | 1176      | 93.3    |
| PIH                  | Yes          | 110       | 8.73    |
|                      | No           | 1150      | 91.27   |
| HGB level            | <11d/dl      | 236       | 18.7    |
|                      | >=11g/dl     | 1024      | 81.3    |
| Chronic hypertension | Yes          | 21        | 1.7     |
|                      | No           | 1239      | 98.3    |
| PROM                 | Yes          | 195       | 15.5    |



|                      |     |      |      |
|----------------------|-----|------|------|
|                      | No  | 1065 | 84.5 |
| Multiple pregnancies | Yes | 90   | 7.2  |
|                      | No  | 1170 | 92.8 |

245 *PROM: Premature rupture of membrane, HGB: hemoglobin, PIH: pregnancy-induced*  
 246 *hypertension, APH: antepartum hemorrhage, GDM: gestational diabetes mellitus*

### 247 Development of prediction model for preterm birth

248 Out of 1260 delivered neonates, 169 (13.4%) (95%, CI (11.6%, 15.4%)) was preterm infants.  
 249 The bivariable logistic regression analysis found several factors were eligible to be included in  
 250 the prediction model. These variables were haemoglobin level, Gravidity, residence, gestational  
 251 diabetes mellitus, APH, PIH, chronic hypertension, PROM, and multiple pregnancies. Using the  
 252 results, a prediction model was developed, and equation for the prediction model was obtained  
 253 table (3).

254 **Table 3: Coefficients and risk scores of each predictor included in the model to predict**  
 255 **preterm birth (n = 1260)**

| Predictors<br>Variables*    | Multivariable analysis        |                   |             |               |
|-----------------------------|-------------------------------|-------------------|-------------|---------------|
|                             | Original $\beta$<br>(95 % CI) | Bootstrap $\beta$ | P-<br>value | Risk<br>score |
| Residence<br>(rural)        | 1.161 ( 0.780, 1.545 )        | 1.148             | <0.001      | 2             |
| Gravidity<br>(primigravida) | 0.675 ( 0.291, 1.061 )        | 0.666             | 0.01        | 1             |
| PROM (yes)                  | 2.081 ( 1.669 , 2.50 )        | 2.051             | <0.001      | 3             |
| APH (yes)                   | 1.364 ( 0.806 , 1.915 )       | 1.348             | <0.001      | 2             |
| PIH (yes)                   | 1.387 ( 0.887 , 1.879 )       | 1.368             | <0.001      | 2             |
| HGB <11g/dl                 | 0.676 ( 0.255 , 1.09 )        | 0.677             | <0.001      | 1             |

256 *\*Variables retained in the reduced model are; residence, APH, hemoglobin, PIH, gravidity, and PROM.*  
 257 *Both backward and forward selection showed the same results.  $\beta$  after internal validation with*  
 258 *bootstrapping is shown. Simplified risk score: we divided the coefficient of predictors included in the*  
 259 *reduced model by the smallest (0.666). The probability or risk of preterm birth =  $1 / (1 + \exp - (-$*

260  $3.517 + 1.148 * \textit{Residence (rural)} + 0.666 * \textit{gravity (primigravida)} + 2.051 * \textit{PROM (yes)} + 1.348$   
261  $* \textit{APH (yes)} + 1.387 * \textit{PIH} + 0.677 * \textit{HGB (<11g/dl)}$ .

262 The AUC of the final reduced model was 0.816 (95% confidence interval: 0.779 – 0.856)  
263 **(Figure 1a)**. The calibration test had a p-value of 0.492, indicating that the model does not  
264 misrepresent the data or the calibration of the model was visually accurate since the observed  
265 and predicted probabilities were similar **(Figure 1b)**.

266 In addition, to verify whether any maternal characteristics were used as a specific predictor of  
267 preterm birth we performed an ROC analysis. The analysis indicated that, residence  
268 (AUC=0.604, 95% CI 0.564 to 0.643), gravity (AUC=0.59, 95% CI 0.571 to 0.628), PROM  
269 (AUC=0.580, 95% CI 0.544 to 0.616), APH (AUC= 0.695, 95% CI 0.661 to 0.729), PIH (AUC=  
270 0.721, 95% CI 0.685 to 0.757), and HGB (AUC=0.630, 95% CI 0.591 to 0.668) emerged as  
271 better predictors of preterm birth **(Figure 2)**.

272 Validation of the model with the bootstrap technique showed hardly any indication of undue  
273 influence by particular observations, with an optimism coefficient of 0.085, resulting AUC of  
274 0.789 (corrected 95% CI: 0.748–0.83).

275 Using the coefficient ( $\beta$ ), the predicted risk cutoff point was a probability of (SpEqualSe >  
276 0.1320), the model has a sensitivity of 75.74%, specificity of 72.87%, a positive predictive value  
277 of 30.2%, and a negative predictive value of 95.1%.

278 When applying DCA, we first evaluate whether our model understudy has a higher net benefit  
279 than the default strategies (referring all and none). This model outperforms the default strategies  
280 across the relevant threshold range. The model has the highest net benefit across the entire range  
281 of threshold probabilities, which indicates that the model has the highest clinical and public  
282 health value. Hence, the referral decision made using the model has a higher net benefit than not  
283 referring at all or referring all regardless of their risk threshold as shown in **figure (3)**.

#### 284 **Risk Classification Using a Simplified Risk Score**

285 We created a simplified risk score from the model for practical use. The reduced model's  
286 prediction score was simplified by rounding all regression coefficients. The simplified score had  
287 a considerably comparable prediction accuracy to the original  $\beta$  coefficients, with an AUC of  
288 0.786 (95%CI: 0.729–0.827) **(figure 4)**. The possible minimum and maximum scores a mother  
289 can have are 0 and 11, respectively.

Using “SpEqualSe”, the suggested threshold score to predict preterm birth using risk scores is  $\geq 3$  with a sensitivity of 75.14 % and specificity of 67.46% table (4).

When dichotomized into low risk ( $< 3$ ) and high risk ( $\geq 3$ ) based on the risk score, 278 (14.36%) were categorized as high risk and 982 (77.9%) as low risk for preterm birth.

**Table 4: Risk classification of preterm birth using simplified prediction score (n = 1260)**

| Score*(risk category) | Prediction Model Based on Maternal Characteristics |                            |
|-----------------------|----------------------------------------------------|----------------------------|
|                       | Number of mothers                                  | Incidence of preterm birth |
| $< 3$ (Low)           | 982 (77.9%)                                        | 72 (7.9%)                  |
| $\geq 3$ (High)       | 278 (14.36%)                                       | 97 (53.59%)                |
| Total                 | 1260 (100%)                                        | 169 (13.4%)                |

\*  $Score = (2*PIH) + (3*PROM) + (hemoglobin < 11 \text{ mg/dl}) + 2*residence + (2*APH) + gravidity.$

## Discussion

In this study, the incidence of preterm birth was found to be 13.4%. Maternal characteristics were identified in this retrospective study to build a preterm birth prediction risk score. We intended to employ maternal features that are easily accessible and pertinent to clinical practice in countries with constrained resources, including Ethiopia. These nations may not have the financial resources to pay for ultrasound exams and laboratory tests. The optimal combination of maternal factors to predict preterm birth includes residency, gravidity, and hemoglobin  $< 11$  mg/dl, early rupture of membranes, antepartum hemorrhage, and pregnancy-induced hypertension, according to the prediction model. The model has an AUC of 0.816 (95%CI: 0.776 – 0.856). Predicting the probability of preterm birth in pregnant women is essential to take appropriate measures accordingly. Identifying women at risk of preterm birth is an important task for clinical care providers. However, in low and middle-income countries, there are only a few methods available for reliably predicting actual preterm labor in women. Previously, the focus of the research was to explain the maternal and fetal determinants of preterm birth. In recent years, the focus shifted to predicting preterm birth optimally using a combined set of characteristics.

Without any advanced laboratory or imaging testing, this study measured the predicted performance of a model based on maternal features during pregnancy. Furthermore, we discovered that utilizing SpEqualSe as an optimal cut point, the sensitivity and specificity of

1  
2  
3 316 this prediction model achieved 75.14 percent and 67.46 percent, respectively, at the score  
4  
5 317 threshold of 3.

6  
7 318 In our study, a combination (residency, gravidity, hemoglobin < 11 mg/dl, early rupture of  
8  
9 319 membranes, antepartum hemorrhage, and pregnancy-induced hypertension) of maternal  
10  
11 320 characteristics resulted in an AUC of 0.816 (95%CI: 0.776 – 0.856), has an excellent accuracy  
12  
13 321 according to diagnostic accuracy classification[44].

14  
15 322 We found that early rupture of membrane is strong predictors of preterm birth. Similar evidence  
16  
17 323 was found in different studies [36, 37, 45, 46]. The effect of a burst membrane on uterine  
18  
19 324 contraction could explain this. Existing scientific evidence confirms that when a membrane  
20  
21 325 ruptures, natural uterotonic chemicals are released, and these uterotonic chemicals drive uterine  
22  
23 326 contraction, resulting in PTB. This finding suggested that due attention should be given to  
24  
25 327 women with premature rupture of membrane.

26  
27 328 In our study, pregnancy-induced hypertension is strong predictors of preterm birth. Similar  
28  
29 329 studies have demonstrated that pregnancy-induced hypertension was predictive of subsequent  
30  
31 330 preterm birth[47, 48]. This could be related to vascular injury to the placenta caused by  
32  
33 331 pregnancy-induced hypertension issues or iatrogenesis caused by the severity of hypertension or  
34  
35 332 its complications. As a result, the oxytocin receptors are activated, resulting in preterm labor and  
36  
37 333 delivery. Or else this conclusion could be explained by current scientific evidence suggesting  
38  
39 334 that PIH is linked to vascular and placental injury, which causes oxytocin receptors to be  
40  
41 335 activated, resulting in PTB. Therefore, it is imperative to identify populations at risk pregnancy-  
42  
43 336 induced hypertension and introduce risk lowering interventions.

44  
45 337 Another strong predictor of preterm birth is the place of residence. Existed evidence shows that  
46  
47 338 there is an association between preterm birth and rural residence [49-53]. This gap may be  
48  
49 339 explained by the greater accessibility and availability of maternal health service in metropolitan  
50  
51 340 regions. It has long been understood that social deprivation and the nuanced interactions between  
52  
53 341 them affect prenatal outcomes, including premature birth[54]. Hence, accessing maternal health  
54  
55 342 services targeted to rural women could improve prenatal outcomes including the risk of preterm  
56  
57 343 birth.

58  
59 344 Antepartum hemorrhage is the predictor of preterm birth which is supported by different  
60  
345 studies[55]. Identification of groups at risk for antepartum hemorrhage and the introduction of  
346 risk-reducing measures are therefore essential. Other predictors of preterm birth are gravidity and

1  
2  
3 347 hemoglobin <11 g/dl (anemia) which is in line with different studies[32, 56]. The molecular  
4  
5 348 factors that could explain how anemia, iron deficiency, or both, could result in preterm delivery.  
6  
7 349 In reality, a number of plausible molecular processes have linked anemia to a higher risk of  
8  
9 350 premature birth. Accordingly, maternal and fetal stress can be caused by anemia (by resulting in  
10  
11 351 hypoxia) and iron deficiency (by increasing serum nor-epinephrine concentrations), which in  
12  
13 352 turn induces the production of corticotrophin-releasing hormone (CRH). Additionally, iron  
14  
15 353 deficiency may raise the risk of maternal infections, which can again boost the synthesis of CRH.  
16  
17 354 High levels of CRH are known to be a risk factor for PTB since they increase the likelihood of  
18  
19 355 PTB [57]. Thus, we can conclude that, in order to prevent PTB, routine ANC services need to  
20  
21 356 place a greater emphasis on anemia prevention.

22  
23 357 A study conducted in China showed that a model developed using advanced maternal age, lower  
24  
25 358 maternal height, history of preterm delivery, amount of vaginal bleeding during pregnancy, and  
26  
27 359 lack of folic acid intake before pregnancy for the prediction of overall preterm birth with AUC of  
28  
29 360 (0.6)[58]. Which had lower discriminatory performance than the present study, this difference  
30  
31 361 may be due to some of the predictors they used such as lower maternal height, lack of folic acid  
32  
33 362 intake before pregnancy, and advanced maternal age. However, the predictors they used such as  
34  
35 363 lack of folic acid intake before pregnancy are not easily obtainable information in routine clinical  
36  
37 364 practice, which makes their model less practical in our setting. This prediction model constitutes  
38  
39 365 variables that are easily obtainable and have reasonable accuracy to be used by both mid-and  
40  
41 366 lower-level health professionals in primary care settings. Among the maternal characteristics  
42  
43 367 included in our model, five can be easily found by history taking and one by test for hemoglobin.  
44  
45 368 The model's accuracy is consistent with a retrospective study done in China that established a  
46  
47 369 preterm birth prediction model based on maternal characteristics, including demographics and  
48  
49 370 clinical characteristics, and a model with predictors (gravidity, educational status, residency,  
50  
51 371 history of preterm birth, twin pregnancy, pre-gestational diabetes mellitus (type I or II), chronic  
52  
53 372 hypertension, and place of birth) with AUC of 0.749 (95%CI: 0.732–0.767) [48].

54  
55 373 On the other hand, a model incorporating four predictors (cervical length at admission,  
56  
57 374 gestational age, amniotic fluid, glucose, and IL-6) has an area under the curve (AUROC) of  
58  
59 375 0.86[59] and similarly, the combination of biophysical, biochemical, immunological,  
60  
376 microbiological, fetal cell, exosomal, or cell-free RNA at different gestational ages, integrated as  
377 part of a multivariable predictor model may be necessary to advance our attempts to predict

1  
2  
3 378 sPTL and preterm birth. In the prediction of spontaneous preterm birth within 48 hours, a  
4  
5 379 prognostic model including qfFN and clinical risk factors showed excellent results[60, 61]. Both  
6  
7 380 models have higher discriminatory performance. The reason for the lower discriminatory  
8  
9 381 performance in our study compared to the studies described above could be because we used  
10  
11 382 secondary data available from the register and as this dataset is limited and some variables that  
12  
13 383 require advanced laboratory tests were not included in the model.

14 384 Hence, predictors necessitate laboratory testing, which is often unavailable in low-resource  
15  
16 385 settings. As a result, such predictors are difficult to come by in ordinary clinical and public  
17  
18 386 health practice, making the model less useful.

19 387 A study conducted in the UK found that data on maternal characteristics and obstetric history at  
20  
21 388 11–13 weeks of gestation were predictive of spontaneous early preterm delivery; this model had  
22  
23 389 an AUC of 0.67[62] which had lower discriminatory performance than the present study. This  
24  
25 390 difference may be the difference in the study population.

26 391 A model that predicts a risk of preterm delivery in women with multiple pregnancy  
27  
28 392 incorporating previous preterm delivery, monochorionicity, smoking, educational level, and  
29  
30 393 triplet pregnancy for preterm and very preterm delivery had a c-index of 0.68 (95% CI 0.63 to  
31  
32 394 0.72) and 0.68 (95% CI 0.62 to 0.75) respectively[63]. It had lower discriminatory performance  
33  
34 395 than the present study. This might be due to the study population difference. In the present study,  
35  
36 396 the study populations were both women who had multiple pregnancies and singleton pregnancy.

37 397 In our prediction score, using 3 as a cutoff point has an acceptable level of specificity,  
38  
39 398 sensitivity, PPV, and NPV to predict preterm birth. It is also possible to shift the cutoff point to  
40  
41 399 increase either of the accuracy measures depending on the program aim and availability of  
42  
43 400 resources.

44 401 The strength of the study was using an adequate number of participants with the outcome, which  
45  
46 402 helped us to construct the model using a sufficient number of predictor variables. In addition, our  
47  
48 403 prediction model was constructed from easily obtainable maternal characteristics that make it  
49  
50 404 applicable in primary care setting and multiple imputation were used to address missing data,  
51  
52 405 which has been shown to be a valid technique for dealing with missing data within logistic  
53  
54 406 regression models, resulting in less bias than excluding all women with missing data.

55 407 However, the findings from this study should be interpreted with the perspective of the following  
56  
57 408 limitations. As a single-site study, it is confined to a single area, which needs external validation

1  
2  
3 409 before using it in another context. Furthermore, data were collected from each mother's card; due  
4  
5 410 to this, some important variables were missed, such as previously highlighted factors with  
6  
7 411 preterm birth in different studies.

8 412

9 413

10 414

### 11 415 **Conclusions and recommendations**

12 416 This study shows the possibility of predicting preterm birth using a simple prediction model  
13 417 constructed from maternal characteristics. Thus, the optimal combination of maternal  
14 418 characteristics such as residence, gravidity, haemoglobin < 11 mg/dl, premature rupture of  
15 419 membrane, antepartum haemorrhage, and pregnancy-induced hypertension shows the possibility  
16 420 of predicting preterm birth using a simple prediction model constructed from maternal  
17 421 characteristics. In addition, risk score calculations based on a combination of predictors was  
18 422 effective and had comparable accuracy with the model-based approach of the original  $\beta$   
19 423 coefficients. This score may assist in clinical decision-making. In addition, incorporating this  
20 424 convenient and easily applicable score in the health care system to be used by clinicians to  
21 425 inform pregnant mothers about the future course of their outcome after external validation.  
22 426 Doing further research is needed to validate the prediction tool using prospective follow-up  
23 427 studies in another context before introducing it to clinical and public health practices.

### 24 428 **Data Sharing Statement**

25 429 Data will be available upon request from the corresponding author.

26 430 **Author Contributions:** S.F.F. conceived the study and wrote the manuscript. Z.A.A, S.F.F,  
27 431 G.T.W, A.K.Y, and A.M.D, all contribute to data analysis, study design, and supervision of data  
28 432 collection. All authors participated in manuscript revision for intellectual content and approval of  
29 433 the final version. All authors have read and agreed to the published version of the manuscript.

30 434 **Funding statement:** This work was supported by Bahir Dar University grant number  
31 435 (25000ETB).

32 436 **Competing interest's statement:** The author reports no conflicts of interest in this work.

### 33 437 **Ethical approval**

34 438 Ethical clearance was obtained from the Institutional Review Board (IRB) of Bahir Dar  
35 439 University, College of Medicine and Health Sciences with Protocol number 083/ 2021) on

1  
2  
3 440 February 26, 2021. It is a retrospective study of medical records and personal identifiers were not  
4  
5 441 used on the data collection checklist. So, the IRB waived the requirement for informed consent  
6  
7 442 from each participant. Confidentiality was maintained by omitting the personal identifier of the  
8  
9 443 participant during the data collection procedure and the information was used only for research  
10  
11 444 purposes. Data were collected from the register, which was kept in a secure place and all data  
12  
13 445 were fully anonymized before we accessed them. After the collection of data, all patient records  
14  
15 446 and patient cards were placed back in a secure place. Data were entered into a password-  
16  
17 447 protected computer.  
18  
19 448  
20  
21 449  
22  
23 450  
24  
25 451  
26  
27 452  
28  
29 453  
30  
31 454

## References

- 31 455 1. Organization WH: **Preterm birth and low birth weight**. 2020.
- 32 456 2. Goldenberg RL, Culhane JF, Iams JD, Romero R. Epidemiology and causes of preterm birth.  
33 457 *Lancet* 2008;371(9606):75e84
- 34 458 3. Althabe F: **Born too soon: the global action report on preterm birth**: World Health  
35 459 Organization; 2012.
- 36 460 4. Liu L, Oza S, Hogan D, Chu Y, Perin J, Zhu J, et al. Global, regional, and national causes of  
37 461 under-5 mortality in 2000-15: an updated systematic analysis with implications for the  
38 462 Sustainable Development Goals. *Lancet*. 2016;388(10063):3027-35.
- 39 463 5. World Health Organization. WHO fact sheet on preterm birth. Available from:  
40 464 <http://www.who.int/mediacentre/factsheets/fs363/en/>
- 41 465 6. Organization WH: **WHO fact sheet: Preterm birth**. *World Health Organization, Geneva,*  
42 466 *Switzerland* <http://www.who.int/mediacentre/factsheets/fs363/en/> Accessed 2018, **26**.
- 43 467 7. Li S, Xi B: **Preterm birth is associated with risk of essential hypertension in later life**.  
44 468 *International journal of cardiology* 2014, **172**(2):e361-e363.
- 45 469 8. Blencowe H, Cousens S, Chou D, Oestergaard M, Say L, Moller A-B, Kinney M, Lawn J: **Born**  
46 470 **too soon: the global epidemiology of 15 million preterm births**. *Reproductive health* 2013,  
47 471 **10**(S1):S2.



- 1  
2  
3 472 9. Soon BT: **The global action report on preterm birth**. Geneva: World Health Organization  
4 473 2012.
- 6 474 10. Griffin JB, Jobe AH, Rouse D, McClure EM, Goldenberg RL, Kamath-Rayne BD: **Evaluating**  
7 475 **WHO-recommended interventions for preterm birth: a mathematical model of the potential**  
8 476 **reduction of preterm mortality in Sub-Saharan Africa**. *Global Health: Science and Practice*  
9 477 2019, 7(2):215-227.
- 12 478 11. Victora CG, Rubens CE, Group GR: **Global report on preterm birth and stillbirth (4 of 7):**  
13 479 **delivery of interventions**. *BMC Pregnancy and Childbirth* 2010, 10(S1):S4.
- 16 480 12. Kemp M, Newnham J, Challis J, Jobe A, Stock S: **The clinical use of corticosteroids in**  
17 481 **pregnancy**. *Human reproduction update* 2016, 22(2):240-259.
- 19 482 13. Lorthe E, Goffinet F, Marret S, Vayssiere C, Flamant C, Quere M, Benhammou V, Ancel P-Y,  
20 483 Kayem G: **Tocolysis after preterm premature rupture of membranes and neonatal outcome:**  
21 484 **a propensity-score analysis**. *American Journal of Obstetrics and Gynecology* 2017, 217(2):212.  
23 485 e211-212. e212.
- 25 486 14. Oskovi Kaplan ZA, Ozgu-Erdinc AS: **Prediction of Preterm Birth: Maternal Characteristics,**  
26 487 **Ultrasound Markers, and Biomarkers: An Updated Overview**. 2018, 2018:8367571.
- 28 488 15. Lucaroni F, Morciano L, Rizzo G: **Biomarkers for predicting spontaneous preterm birth: an**  
29 489 **umbrella systematic review**. 2018, 31(6):726-734.
- 31 490 16. Lee KA, Chang MH, Park M-H, Park H, Ha EH, Park EA, Kim YJ: **A model for prediction of**  
32 491 **spontaneous preterm birth in asymptomatic women**. *Journal of Women's Health* 2011,  
34 492 20(12):1825-1831.
- 36 493 17. Georgiou HM, Di Quinzio MK, Permezel M, Brennecke SP: **Predicting preterm labour:**  
37 494 **current status and future prospects**. *Disease markers* 2015, 2015.
- 39 495 18. Shennan AH: **Prediction and prevention of preterm birth: a quagmire of evidence**.  
40 496 *Ultrasound Obstet Gynecol* 2018, 51(5):569-570.
- 42 497 19. Son M, Miller ES: **Predicting preterm birth: Cervical length and fetal fibronectin**. *Semin*  
43 498 *Perinatol* 2017, 41(8):445-451.
- 46 499 20. Cobo T, Kacerovsky M, Jacobsson B: **Risk factors for spontaneous preterm delivery**.  
47 500 *International Journal of Gynecology & Obstetrics* 2020, 150(1):17-23.
- 49 501 21. Ren H: **Du M. Role of maternal periodontitis in preterm birth**. *Front Immunol*. 2017; 8: 139.  
50 502 In.; 2017.
- 52 503 22. Oskovi Kaplan ZA, Ozgu-Erdinc AS: **Prediction of preterm birth: maternal characteristics,**  
53 504 **ultrasound markers, and biomarkers: an updated overview**. *Journal of pregnancy* 2018,  
55 505 2018.

- 1  
2  
3 506 23. Blencowe H, Cousens S, Oestergaard MZ, Chou D, Moller A-B, Narwal R, Adler A, Garcia CV,  
4 507 Rohde S, Say L, Lawn JE. National, regional, and worldwide estimates of preterm birth rates in  
5 508 the year 2010 with time trends since 1990 for selected countries: a systematic analysis and  
6 509 implications. *The Lancet*. 2012;379(9832):2162–72. [https://doi.org/10.1016/s0140-](https://doi.org/10.1016/s0140-6736(12)60820-4)  
7 510 6736(12)60820-4.
- 11 511 24. Kleinrouweler CE, Cheong-See FM, Collins GS, Kwee A, Thangaratinam S, Khan KS, Mol  
12 512 BWJ, Pajkrt E, Moons KG, Schuit E: **Prognostic models in obstetrics: available, but far from**  
13 513 **applicable**. *American journal of obstetrics and gynecology* 2016, 214(1):79-90. e36.
- 16 514 25. Sananes N, Langer B, Gaudineau A, Kutnahorsky R, Aissi G, Fritz G, Boudier E, Viville B,  
17 515 Nisand I, Favre R: **Prediction of spontaneous preterm delivery in singleton pregnancies:**  
18 516 **where are we and where are we going? A review of literature**. *Journal of Obstetrics and*  
19 517 *Gynaecology* 2014, 34(6):457-461.
- 22 518 26. Catley C, Frize M, Walker RC, Petriu DC: **Predicting high-risk preterm birth using artificial**  
23 519 **neural networks**. *IEEE Transactions on information technology in biomedicine* 2006, 10(3):540-  
24 520 549.
- 27 521 27. Raglan GB, Lannon SM, Jones KM, Schulkin J: **Racial and ethnic disparities in preterm birth**  
28 522 **among American Indian and Alaska Native women**. *Maternal and child health journal* 2016,  
29 523 20(1):16-24.
- 31 524 28. Culhane JF, Goldenberg RL: **Racial disparities in preterm birth**. In: *Seminars in perinatology:*  
32 525 *2011: Elsevier; 2011: 234-239*.
- 35 526 29. York TP, Strauss III JF, Neale MC, Eaves LJ: **Racial differences in genetic and environmental**  
36 527 **risk to preterm birth**. *PloS one* 2010, 5(8):e12391.
- 38 528 30. Koullali B, Oudijk M, Nijman T, Mol B, Pajkrt E: **Risk assessment and management to**  
39 529 **prevent preterm birth**. In: *Seminars in Fetal and Neonatal Medicine: 2016: Elsevier; 2016: 80-*  
40 530 *88*.
- 42 531 31. Peduzzi P, Concato J, Kemper E, Holford TR, Feinstein AR: **A simulation study of the number**  
43 532 **of events per variable in logistic regression analysis**. *J Clin Epidemiol* 1996, 49(12):1373-  
44 533 1379.
- 47 534 32. Mekonen DG, Yismaw AE, Nigussie TS, Ambaw WM: **Proportion of Preterm birth and**  
48 535 **associated factors among mothers who gave birth in Debretabor town health institutions,**  
49 536 **northwest, Ethiopia**. *BMC Research Notes* 2019, 12(1):2.
- 52 537 33. Tigist B, Abdela A, Zenebe G: **Preterm birth and associated factors among mothers who gave**  
53 538 **birth in Debre Markos Town Health Institutions**. *Institutional Based Cross sectional study*  
54 539 *2013*.

- 1  
2  
3 540 34. Rosenberg RE, Ahmed ANU, Ahmed S, Saha SK, Chowdhury MA, Black RE, Santosham M,  
4 541 Darmstadt GL: **Determining gestational age in a low-resource setting: validity of last**  
5 542 **menstrual period.** *Journal of health, population, and nutrition* 2009, 27(3):332.  
6  
7  
8 543 35. Wassie M, Manaye Y, Abeje G, Tifrie M, Worku G: **Determinants of Preterm Birth among**  
9 544 **Newborns Delivered in Bahir Dar City Public Hospitals, North West Ethiopia.** 2020.  
10  
11 545 36. Woday A, Muluneh MD, Sherif S: **Determinants of preterm birth among mothers who gave**  
12 546 **birth at public hospitals in the Amhara region, Ethiopia: A case-control study.** *PloS one*  
13 547 2019, 14(11):e0225060.  
14  
15  
16 548 37. Wudie F, Tesfamichael F, Fisseha H, Weldehawaria N, Misigena K, Alema H, Gebregziabher Y,  
17 549 Fisseha G, Woldu M: **Determinants of preterm delivery in the central zone of Tigray,**  
18 550 **northern Ethiopia: A case-control study.** *South African Journal of Child Health* 2019,  
19 551 13(3):108-114.  
20  
21  
22 552 38. Woldeyohannes D, Kene C, Gomora D, Seyoum K, Assefa T: **Factors Associated with Preterm**  
23 553 **Birth among Mothers Who gave Birth in Dodola Town Hospitals, Southeast Ethiopia:**  
24 554 **Institutional Based Cross Sectional Study.** *Clinics Mother Child Health* 2019, 16(317):2.  
25  
26  
27 555 39. Muchie KF, Lakew AM, Teshome DF, Yenit MK, Sisay MM, Mekonnen FA, Habitu YA:  
28 556 **Epidemiology of preterm birth in Ethiopia: systematic review and meta-analysis.** *BMC*  
29 557 *pregnancy and childbirth* 2020, 20(1):1-12.  
30  
31  
32 558 40. Kwak SK, Kim JH: **Statistical data preparation: management of missing values and outliers.**  
33 559 *Korean journal of anesthesiology* 2017, 70(4):407.  
34  
35 560 41. Grobbee DE, Hoes AW. **Clinical epidemiology: principles, methods, and applications for clinical**  
36 561 **research:** Jones & Bartlett Publishers; 2014.  
37  
38 562 42. Moons KGM, Kengne AP, Woodward M, et al. **Risk prediction models: I. Development, internal**  
39 563 **validation, and assessing the incremental value of a new (bio)marker.** *Heart* 2012;98:683-90.  
40 564 [Crossref] [PubMed]  
41  
42  
43 565 43. Vickers AJ, Elkin EB: **Decision curve analysis: a novel method for evaluating prediction**  
44 566 **models.** *Med Decis Making* 2006, 26(6):565-574.  
45  
46 567 44. Mandrekar JN: **Receiver Operating Characteristic Curve in Diagnostic Test Assessment.**  
47 568 *Journal of Thoracic Oncology* 2010, 5(9):1315-1316.  
48  
49 569 45. Brhane M, Hagos B, Abrha MW, Weldearegay HG: **Does short inter-pregnancy interval**  
50 570 **predicts the risk of preterm birth in Northern Ethiopia?** 2019, 12(1):405.  
51  
52 571 46. Sifer S, Kedir B, Demisse G, Sisay Y: **Determinants of preterm birth in neonatal intensive**  
53 572 **care units at public hospitals in Sidama zone, South East Ethiopia; case control study.** *J*  
54 573 *Pediatr Neonatal Care* 2019, 9(6):180-186.  
55  
56  
57

- 1  
2  
3 574 47. Xu X, Tan H, Zhou S, He Y, Shen L, Liu Y, Hu L, Wang X, Li X: **Study on the application of**  
4 **Back-Propagation Artificial Neural Network used the model in predicting preterm birth.**  
5 575  
6 576 *Zhonghua liu Xing Bing xue za zhi= Zhonghua Liuxingbingxue Zazhi* 2014, 35(9):1028-1031.  
7  
8 577 48. Chen M, Xie N, Liang Z, Qian T, Chen D: **Early Prediction Model for Preterm Birth**  
9 **Combining Demographic Characteristics and Clinical Characteristics.** 2020.  
10 578  
11 579 49. Kebede EB, Terfa YB, Geleta BA, Akuma AO: **Predictors of preterm birth in Jimma town**  
12 **public hospitals, Jimma, Ethiopia.** *Journal of Pediatric and Neonatal Individualized Medicine*  
13 580 *(JPNIM)* 2021, 10(1):e100125-e100125.  
14 581  
15 582 50. Belaynew W, Teumay A, Getachew G, Mohamed K: **Effects of inter pregnancy interval on**  
16 **preterm birth and associated factors among postpartum mothers who gave birth at Felege**  
17 583 **Hiwot referral hospital.** *World J Pharm Pharm Sci* 2015, 4(4):12-25.  
18 584  
19 585 51. Muhumed II, Kebira JY, Mabalhin MO: **Preterm Birth and Associated Factors Among**  
20 **Mothers Who Gave Birth in Fafen Zone Public Hospitals, Somali Regional State, Eastern**  
21 586 **Ethiopia.** *Research and Reports in Neonatology* 2021, 11:23-33.  
22 587  
23 588 52. Zhang Y-P, Liu X-H, Gao S-H, Wang J-M, Gu Y-S, Zhang J-Y, Zhou X, Li Q-X: **Risk factors**  
24 **for preterm birth in five Maternal and Child Health hospitals in Beijing.** *PloS one* 2012,  
25 589 7(12):e52780.  
26 590  
27 591 53. Wagura P: **factors associated with preterm birth at kenyatta national Hospital.** *BMC*  
28 592 *Pregnancy Childbirth* (18).  
29 593  
30 594 54. Panaretto K, Lee H, Mitchell M, et al. Risk factors for preterm, low birth weight and small for  
31 595 gestational age birth in urban Aboriginal and Torres Strait Islander women in Townsville. *Aust N*  
32 596 *Z J Public Health.* 2006;30(2):163–170. doi:10.1111/j.1467-842X.2006.tb00111.  
33 597  
34 598 55. Olusanya BO, Ofofwe GE: **Predictors of preterm births and low birthweight in an inner-city**  
35 **hospital in sub-Saharan Africa.** *Maternal and child health journal* 2010, 14(6):978-986.  
36 599  
37 600 56. Mekuriyaw AM, Mihret MS, Yismaw AE: **Determinants of Preterm Birth among Women**  
38 **Who Gave Birth in Amhara Region Referral Hospitals, Northern Ethiopia, 2018:**  
39 **Institutional Based Case Control Study.** *International Journal of Pediatrics* 2020, 2020.  
40 601  
41 602 57. !!! INVALID CITATION !!! .  
42 603  
43 604 58. He J-R, Ramakrishnan R, Lai Y-M, Li W-D, Zhao X, Hu Y, Chen N-N, Hu F, Lu J-H, Wei X-L:  
44 **Predictions of preterm birth from early pregnancy characteristics: born in guangzhou**  
45 **cohort study.** *Journal of clinical medicine* 2018, 7(8):185.  
46 606  
47 605 59. Cobo T, Aldecoa V, Figueras F, Herranz A, Ferrero S, Izquierdo M, Murillo C, Amoedo R,  
48 Rueda C, Bosch J: **Development and validation of a multivariable prediction model of**

- 1  
2  
3 607 **spontaneous preterm delivery and microbial invasion of the amniotic cavity in women with**  
4 **preterm labor. *American Journal of Obstetrics and Gynecology* 2020.**  
5 608  
6 609 60. Lamont R, Richardson L, Boniface J, Cobo T, Exner M, Christensen I, Forslund S, Gaba A,  
7 Helmer H, Jørgensen J: **Commentary on a combined approach to the problem of developing**  
8 **biomarkers for the prediction of spontaneous preterm labor that leads to preterm birth.**  
9 ***Placenta* 2020.**  
10 611  
11 612  
12 613 61. Stock SJ, Horne M, Bruijn M, Morris R, Dorling J, Jackson L, Chandiramani M, David AL,  
13 Khalil A, Shennan A: **793: A new prediction model for birth within 48 hours in women with**  
14 **preterm labour symptoms. *American Journal of Obstetrics & Gynecology* 2020, 222(1):S502.**  
15 615  
16 616 62. Beta, J.; Akolekar, R.; Ventura, W.; Syngelaki, A.; Nicolaides, K.H. Prediction of spontaneous  
17 preterm delivery from maternal factors, obstetric history and placental perfusion and function at  
18 11–13 weeks. *Prenat. Diagn.* 2011, 31, 75–83  
19 617  
20 618  
21 619 63. van de Mheen L, Schuit E, Lim AC, Porath MM, Papatsonis D, Erwich JJ, van Eyck J, Van  
22 Oirschot CM, Hummel P, Duvekot JJ: **Prediction of preterm birth in multiple pregnancies:**  
23 **development of a multivariable model including cervical length measurement at 16 to 21**  
24 **weeks' gestation. *Journal of obstetrics and gynaecology Canada* 2014, 36(4):309-319.**  
25 621  
26 622  
27 623  
28  
29  
30 624  
31  
32 625  
33  
34 626  
35 627  
36  
37 628  
38  
39 629  
40  
41 630  
42 631  
43  
44 632  
45  
46 633  
47  
48 634  
49 635  
50  
51 636  
52  
53 637  
54  
55  
56  
57

1  
2  
3 638 **Figure 1:** (a) Area under the ROC curve for the prediction model, and (b) Predicted versus  
4  
5 639 observed preterm birth probability in the sample. This analysis includes mothers who gave birth  
6  
7 640 at FHCSH, 2021(n = 1260). Calibration plot created using “givitiCalibrationBelt” in R  
8  
9 641 programming.

10  
11  
12 642 **Figure 2:** Receiver operating characteristic curve of maternal parameters for prediction of  
13  
14 643 postpartum glucose intolerance. Residence, PROM, APH, PIH, HGB and Gravidity.

15  
16  
17 644 **Figure 3:** A decision curve plotting the net benefit of the model against threshold probability.

18  
19 645 **Figure 4:** Area under the ROC curve for the simplified risk score to predict the risk of preterm  
20  
21 646 birth among mothers who gave birth at FHCSH, 2021.

22  
23  
24 647

25  
26 648

27  
28 649

29  
30 650

31  
32 651

33  
34 652

35  
36 653

37  
38 654

39  
40 655

41  
42 656  
43  
44  
45  
46  
47  
48  
49  
50  
51  
52  
53  
54  
55  
56  
57

1  
2  
3  
4  
5  
6  
7  
8  
9  
10  
11  
12  
13  
14  
15  
16  
17  
18  
19  
20  
21  
22  
23  
24  
25  
26  
27  
28  
29  
30  
31  
32  
33  
34  
35  
36  
37  
38  
39  
40  
41  
42  
43  
44  
45  
46  
47  
48  
49  
50  
51  
52  
53  
54  
55  
56  
57  
58  
59  
60

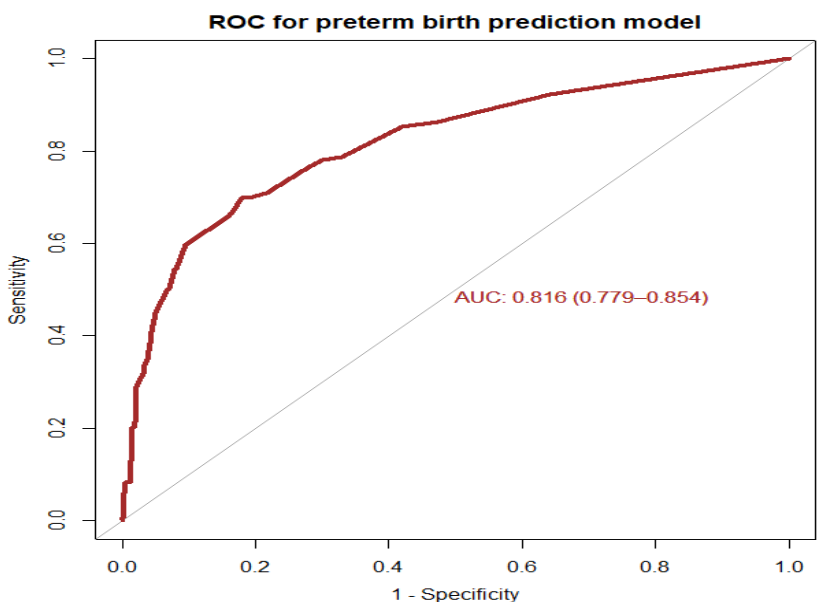

a)

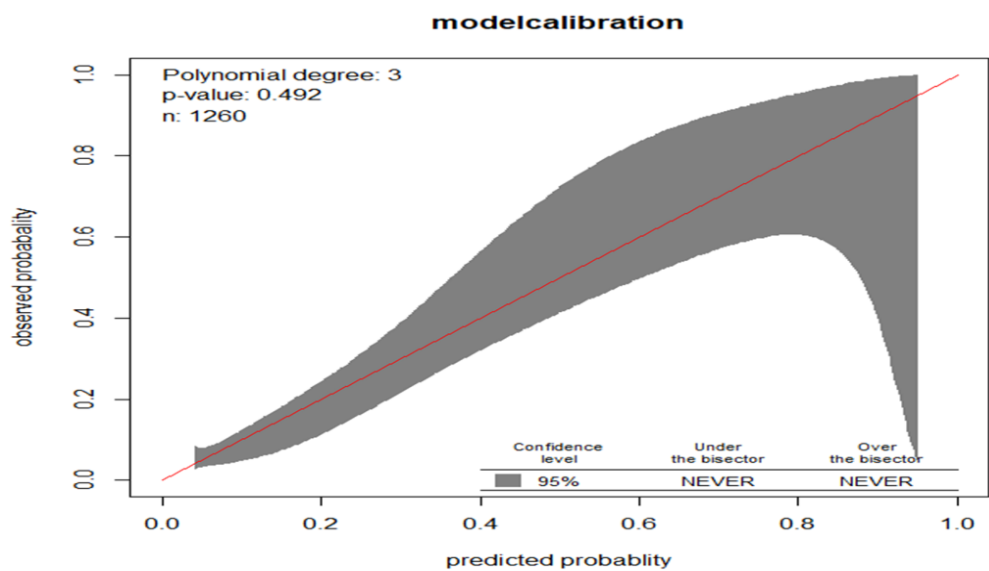

b)

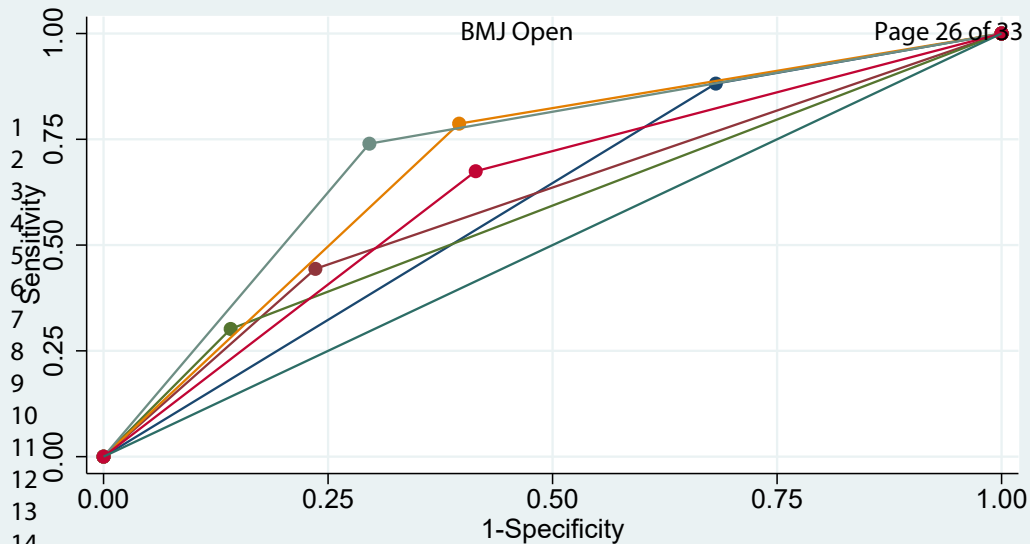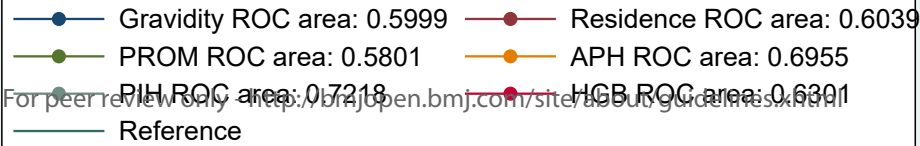

For peer review only - <http://bmjopen.bmj.com/site/about/guidelines.xhtml>



1  
2  
3  
4  
5  
6  
7  
8  
9  
10  
11  
12  
13  
14  
15  
16  
17  
18  
19  
20  
21  
22  
23  
24  
25  
26  
27  
28  
29  
30  
31  
32  
33  
34  
35  
36  
37  
38  
39  
40  
41  
42  
43  
44  
45  
46  
47  
48  
49  
50  
51  
52  
53  
54  
55  
56  
57  
58  
59  
60

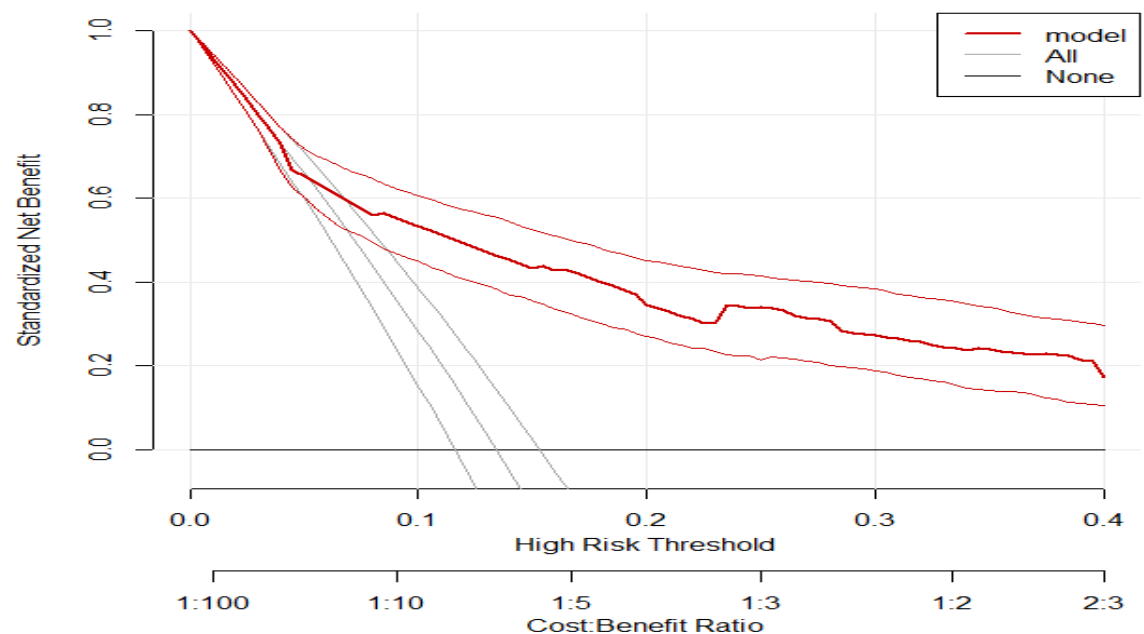

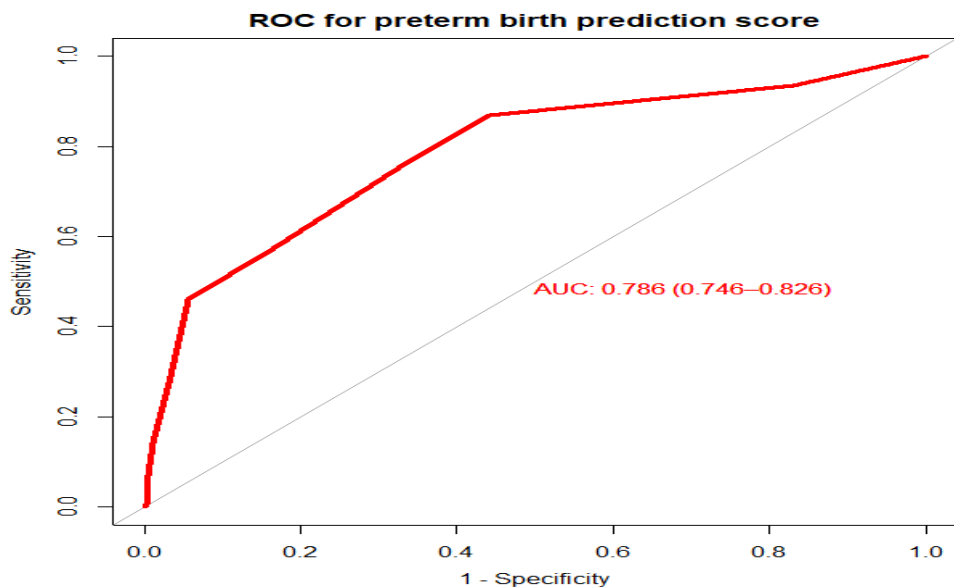

Peer review only

**The RECORD statement – checklist of items, extended from the STROBE statement that should be reported in observational studies using routinely collected health data.**

|                           | Item No. | STROBE items                                                                                                                                                                               | Location in manuscript where items are reported | RECORD items                                                                                                                                                                                                                                                                                                                                                                                                                                | Location in manuscript where items are reported |
|---------------------------|----------|--------------------------------------------------------------------------------------------------------------------------------------------------------------------------------------------|-------------------------------------------------|---------------------------------------------------------------------------------------------------------------------------------------------------------------------------------------------------------------------------------------------------------------------------------------------------------------------------------------------------------------------------------------------------------------------------------------------|-------------------------------------------------|
| <b>Title and abstract</b> |          |                                                                                                                                                                                            |                                                 |                                                                                                                                                                                                                                                                                                                                                                                                                                             |                                                 |
|                           | 1        | (a) Indicate the study's design with a commonly used term in the title or the abstract (b) Provide in the abstract an informative and balanced summary of what was done and what was found | Line 1-59                                       | RECORD 1.1: The type of data used should be specified in the title or abstract. When possible, the name of the databases used should be included.<br><br>RECORD 1.2: If applicable, the geographic region and timeframe within which the study took place should be reported in the title or abstract.<br><br>RECORD 1.3: If linkage between databases was conducted for the study, this should be clearly stated in the title or abstract. | Line 1-59                                       |
| <b>Introduction</b>       |          |                                                                                                                                                                                            |                                                 |                                                                                                                                                                                                                                                                                                                                                                                                                                             |                                                 |
| Background rationale      | 2        | Explain the scientific background and rationale for the investigation being reported                                                                                                       | Line 60-100                                     |                                                                                                                                                                                                                                                                                                                                                                                                                                             |                                                 |
| Objectives                | 3        | State specific objectives, including any prespecified hypotheses                                                                                                                           | Line 96-98                                      |                                                                                                                                                                                                                                                                                                                                                                                                                                             |                                                 |
| <b>Methods</b>            |          |                                                                                                                                                                                            |                                                 |                                                                                                                                                                                                                                                                                                                                                                                                                                             |                                                 |
| Study Design              | 4        | Present key elements of study design early in the paper                                                                                                                                    | Line 103                                        |                                                                                                                                                                                                                                                                                                                                                                                                                                             |                                                 |
| Setting                   | 5        | Describe the setting, locations, and relevant dates, including periods of recruitment, exposure, follow-up, and data collection                                                            | Line 103-113<br>Line 123-128                    |                                                                                                                                                                                                                                                                                                                                                                                                                                             |                                                 |
| Participants              | 6        | (a) <i>Cohort study</i> - Give the eligibility criteria, and the                                                                                                                           | Line 123-128                                    | RECORD 6.1: The methods of study population selection (such as codes or                                                                                                                                                                                                                                                                                                                                                                     | Line 129-135                                    |

|                                                                                                                                           |                              |                                                                                                                                                                                                                                                                                                                                                                                                                                                                                                                                                                                                                                          |                                                                                                                                                                                      |                                                                                                                                                                                                                                                                                                                                                                                                                                                                                                                                                                                                                       |                                                                                                                                                                                                                 |              |
|-------------------------------------------------------------------------------------------------------------------------------------------|------------------------------|------------------------------------------------------------------------------------------------------------------------------------------------------------------------------------------------------------------------------------------------------------------------------------------------------------------------------------------------------------------------------------------------------------------------------------------------------------------------------------------------------------------------------------------------------------------------------------------------------------------------------------------|--------------------------------------------------------------------------------------------------------------------------------------------------------------------------------------|-----------------------------------------------------------------------------------------------------------------------------------------------------------------------------------------------------------------------------------------------------------------------------------------------------------------------------------------------------------------------------------------------------------------------------------------------------------------------------------------------------------------------------------------------------------------------------------------------------------------------|-----------------------------------------------------------------------------------------------------------------------------------------------------------------------------------------------------------------|--------------|
| 1<br>2<br>3<br>4<br>5<br>6<br>7<br>8<br>9<br>10<br>11<br>12<br>13<br>14<br>15<br>16<br>17<br>18<br>19<br>20<br>21<br>22<br>23<br>24<br>25 |                              | sources and methods of selection of participants. Describe methods of follow-up<br><i>Case-control study</i> - Give the eligibility criteria, and the sources and methods of case ascertainment and control selection. Give the rationale for the choice of cases and controls<br><i>Cross-sectional study</i> - Give the eligibility criteria, and the sources and methods of selection of participants<br><br>(b) <i>Cohort study</i> - For matched studies, give matching criteria and number of exposed and unexposed<br><i>Case-control study</i> - For matched studies, give matching criteria and the number of controls per case |                                                                                                                                                                                      | algorithms used to identify subjects) should be listed in detail. If this is not possible, an explanation should be provided.<br><br>RECORD 6.2: Any validation studies of the codes or algorithms used to select the population should be referenced. If validation was conducted for this study and not published elsewhere, detailed methods and results should be provided.<br><br>RECORD 6.3: If the study involved linkage of databases, consider use of a flow diagram or other graphical display to demonstrate the data linkage process, including the number of individuals with linked data at each stage. |                                                                                                                                                                                                                 |              |
| 26<br>27<br>28<br>29<br>30<br>31<br>32                                                                                                    | Variables                    | 7                                                                                                                                                                                                                                                                                                                                                                                                                                                                                                                                                                                                                                        | Clearly define all outcomes, exposures, predictors, potential confounders, and effect modifiers. Give diagnostic criteria, if applicable.                                            | Line 137-147                                                                                                                                                                                                                                                                                                                                                                                                                                                                                                                                                                                                          | RECORD 7.1: A complete list of codes and algorithms used to classify exposures, outcomes, confounders, and effect modifiers should be provided. If these cannot be reported, an explanation should be provided. | Line 137-147 |
| 33<br>34<br>35<br>36<br>37<br>38<br>39<br>40                                                                                              | Data sources/<br>measurement | 8                                                                                                                                                                                                                                                                                                                                                                                                                                                                                                                                                                                                                                        | For each variable of interest, give sources of data and details of methods of assessment (measurement). Describe comparability of assessment methods if there is more than one group | Line 142-147                                                                                                                                                                                                                                                                                                                                                                                                                                                                                                                                                                                                          |                                                                                                                                                                                                                 |              |
| 41<br>42                                                                                                                                  | Bias                         | 9                                                                                                                                                                                                                                                                                                                                                                                                                                                                                                                                                                                                                                        | Describe any efforts to address potential sources of bias                                                                                                                            | Line 123-141                                                                                                                                                                                                                                                                                                                                                                                                                                                                                                                                                                                                          |                                                                                                                                                                                                                 |              |
| 43<br>44<br>45<br>46<br>47                                                                                                                | Study size                   | 10                                                                                                                                                                                                                                                                                                                                                                                                                                                                                                                                                                                                                                       | Explain how the study size was                                                                                                                                                       | Line 114-122                                                                                                                                                                                                                                                                                                                                                                                                                                                                                                                                                                                                          |                                                                                                                                                                                                                 |              |

|                                                                                                                                           |                                  |            |                                                                                                                                                                                                                                                                                                                                                                                                                                                                                                                                                                      |              |                                                                                                                                                                                                                                                              |
|-------------------------------------------------------------------------------------------------------------------------------------------|----------------------------------|------------|----------------------------------------------------------------------------------------------------------------------------------------------------------------------------------------------------------------------------------------------------------------------------------------------------------------------------------------------------------------------------------------------------------------------------------------------------------------------------------------------------------------------------------------------------------------------|--------------|--------------------------------------------------------------------------------------------------------------------------------------------------------------------------------------------------------------------------------------------------------------|
|                                                                                                                                           |                                  | arrived at |                                                                                                                                                                                                                                                                                                                                                                                                                                                                                                                                                                      |              |                                                                                                                                                                                                                                                              |
| 1<br>2<br>3<br>4<br>5<br>6                                                                                                                | Quantitative variables           | 11         | Explain how quantitative variables were handled in the analyses. If applicable, describe which groupings were chosen, and why                                                                                                                                                                                                                                                                                                                                                                                                                                        | Line 155-198 |                                                                                                                                                                                                                                                              |
| 7<br>8<br>9<br>10<br>11<br>12<br>13<br>14<br>15<br>16<br>17<br>18<br>19<br>20<br>21<br>22<br>23<br>24<br>25<br>26<br>27<br>28<br>29<br>30 | Statistical methods              | 12         | (a) Describe all statistical methods, including those used to control for confounding<br>(b) Describe any methods used to examine subgroups and interactions<br>(c) Explain how missing data were addressed<br>(d) <i>Cohort study</i> - If applicable, explain how loss to follow-up was addressed<br><i>Case-control study</i> - If applicable, explain how matching of cases and controls was addressed<br><i>Cross-sectional study</i> - If applicable, describe analytical methods taking account of sampling strategy<br>(e) Describe any sensitivity analyses | Line 155-198 |                                                                                                                                                                                                                                                              |
| 31<br>32<br>33<br>34<br>35<br>36<br>37<br>38<br>39<br>40<br>41                                                                            | Data access and cleaning methods |            | Line 148-154                                                                                                                                                                                                                                                                                                                                                                                                                                                                                                                                                         |              | RECORD 12.1: Authors should describe the extent to which the investigators had access to the database population used to create the study population.<br><br>RECORD 12.2: Authors should provide information on the data cleaning methods used in the study. |
| 42<br>43<br>44                                                                                                                            | Linkage                          |            | ..                                                                                                                                                                                                                                                                                                                                                                                                                                                                                                                                                                   |              | RECORD 12.3: State whether the study included person-level, institutional-                                                                                                                                                                                   |
|                                                                                                                                           |                                  |            |                                                                                                                                                                                                                                                                                                                                                                                                                                                                                                                                                                      |              | Line 130-132                                                                                                                                                                                                                                                 |

|                  |    |                                                                                                                                                                                                                                                                                                                                                 |              |                                                                                                                                                                                                                                                                                                                    |              |
|------------------|----|-------------------------------------------------------------------------------------------------------------------------------------------------------------------------------------------------------------------------------------------------------------------------------------------------------------------------------------------------|--------------|--------------------------------------------------------------------------------------------------------------------------------------------------------------------------------------------------------------------------------------------------------------------------------------------------------------------|--------------|
|                  |    |                                                                                                                                                                                                                                                                                                                                                 |              | level, or other data linkage across two or more databases. The methods of linkage and methods of linkage quality evaluation should be provided.                                                                                                                                                                    |              |
| <b>Results</b>   |    |                                                                                                                                                                                                                                                                                                                                                 |              |                                                                                                                                                                                                                                                                                                                    |              |
| Participants     | 13 | (a) Report the numbers of individuals at each stage of the study ( <i>e.g.</i> , numbers potentially eligible, examined for eligibility, confirmed eligible, included in the study, completing follow-up, and analysed)<br>(b) Give reasons for non-participation at each stage.<br>(c) Consider use of a flow diagram                          | Line 130-135 | RECORD 13.1: Describe in detail the selection of the persons included in the study ( <i>i.e.</i> , study population selection) including filtering based on data quality, data availability and linkage. The selection of included persons can be described in the text and/or by means of the study flow diagram. | Line 130-135 |
| Descriptive data | 14 | (a) Give characteristics of study participants ( <i>e.g.</i> , demographic, clinical, social) and information on exposures and potential confounders<br>(b) Indicate the number of participants with missing data for each variable of interest<br>(c) <i>Cohort study</i> - summarise follow-up time ( <i>e.g.</i> , average and total amount) | Line 232-241 |                                                                                                                                                                                                                                                                                                                    |              |
| Outcome data     | 15 | <i>Cohort study</i> - Report numbers of outcome events or summary measures over time<br><i>Case-control study</i> - Report numbers in each exposure category, or summary measures of exposure<br><i>Cross-sectional study</i> - Report numbers of outcome events or summary measures                                                            | Line 247     |                                                                                                                                                                                                                                                                                                                    |              |
| Main results     | 16 | (a) Give unadjusted estimates                                                                                                                                                                                                                                                                                                                   | Line 246-286 |                                                                                                                                                                                                                                                                                                                    |              |

|                   |    |                                                                                                                                                                                                                                                                                                                                                                                   |              |                                                                                                                                                                                                                                                                                                          |       |
|-------------------|----|-----------------------------------------------------------------------------------------------------------------------------------------------------------------------------------------------------------------------------------------------------------------------------------------------------------------------------------------------------------------------------------|--------------|----------------------------------------------------------------------------------------------------------------------------------------------------------------------------------------------------------------------------------------------------------------------------------------------------------|-------|
|                   |    | and, if applicable, confounder-adjusted estimates and their precision (e.g., 95% confidence interval). Make clear which confounders were adjusted for and why they were included<br>(b) Report category boundaries when continuous variables were categorized<br>(c) If relevant, consider translating estimates of relative risk into absolute risk for a meaningful time period |              |                                                                                                                                                                                                                                                                                                          |       |
| Other analyses    | 17 | Report other analyses done—e.g., analyses of subgroups and interactions, and sensitivity analyses                                                                                                                                                                                                                                                                                 | Line 162-166 |                                                                                                                                                                                                                                                                                                          |       |
| <b>Discussion</b> |    |                                                                                                                                                                                                                                                                                                                                                                                   |              |                                                                                                                                                                                                                                                                                                          |       |
| Key results       | 18 | Summarise key results with reference to study objectives                                                                                                                                                                                                                                                                                                                          | Line 351-362 |                                                                                                                                                                                                                                                                                                          |       |
| Limitations       | 19 | Discuss limitations of the study, taking into account sources of potential bias or imprecision. Discuss both direction and magnitude of any potential bias                                                                                                                                                                                                                        | Line 50-59   | RECORD 19.1: Discuss the implications of using data that were not created or collected to answer the specific research question(s). Include discussion of misclassification bias, unmeasured confounding, missing data, and changing eligibility over time, as they pertain to the study being reported. | ..... |
| Interpretation    | 20 | Give a cautious overall interpretation of results considering objectives, limitations, multiplicity of analyses, results from similar studies, and other relevant evidence                                                                                                                                                                                                        | Line 351-362 |                                                                                                                                                                                                                                                                                                          |       |
| Generalisability  | 21 | Discuss the generalisability (external validity) of the study results                                                                                                                                                                                                                                                                                                             | Line 351-362 |                                                                                                                                                                                                                                                                                                          |       |

| Other Information                                         |    |                                                                                                                                                               |          |                                                                                                                                                          |          |
|-----------------------------------------------------------|----|---------------------------------------------------------------------------------------------------------------------------------------------------------------|----------|----------------------------------------------------------------------------------------------------------------------------------------------------------|----------|
| Funding                                                   | 22 | Give the source of funding and the role of the funders for the present study and, if applicable, for the original study on which the present article is based | Line 369 |                                                                                                                                                          |          |
| Accessibility of protocol, raw data, and programming code |    | Line 364                                                                                                                                                      |          | RECORD 22.1: Authors should provide information on how to access any supplemental information such as the study protocol, raw data, or programming code. | Line 364 |

\*Reference: Benchimol EI, Smeeth L, Guttman A, Harron K, Moher D, Petersen I, Sørensen HT, von Elm E, Langan SM, the RECORD Working Committee. The REporting of studies Conducted using Observational Routinely-collected health Data (RECORD) Statement. *PLoS Medicine* 2015; in press.

\*Checklist is protected under Creative Commons Attribution ([CC BY](https://creativecommons.org/licenses/by/4.0/)) license.
